1  
2  
3  
4  
5  
6  
7  
8  
9  
10  
11  
12  
13  
14  
15  
16  
17  
18  
19  
20  
21  
22

**Slug/Snail2 is involved in the repression of proliferation  
genes by TGF- $\beta$  in bronchial epithelial progenitor cells and is  
deregulated in abnormal epithelium**

Chamseddine Ben Brahim<sup>1,2</sup>, Charlotte Courageux<sup>1,2</sup>, Ariane Jolly<sup>3</sup>, Bérengère Ouine<sup>4</sup>, Aurélie  
Cartier<sup>4</sup>, Pierre de la Grange<sup>3</sup>, Leanne de Koning<sup>4</sup>, Pascale Leroy<sup>1,2\*</sup>

<sup>1</sup> INSERM UMR1152, Physiopathology and Epidemiology of Respiratory Diseases, Paris, France  
<sup>2</sup> Faculty of Medicine, Paris Diderot University, Bichat Campus, Paris, France.  
<sup>3</sup> GenoSplice, Paris, France  
<sup>4</sup> Institut Curie, PSL Research University, Department of Translational Research, RPPA platform,  
Paris, France

\*Corresponding author  
E-mail: [pascale.leroy@inserm.fr](mailto:pascale.leroy@inserm.fr) (PL)



44 that present many anomalies in their bronchial epithelium this function of Slug is lost and Slug  
45 and proliferation genes are simultaneously but independently regulated by TGF- $\beta$ .

46

## 47 **Introduction**

48 Slug (Snail2) belongs with Snail (Snail1) and Smuc (Snail3) to the Snail family of zinc  
49 finger transcription factors and has been studied essentially for its function as an inducer of  
50 Epithelial-Mesenchymal Transition (EMT) (1). Like other EMT-inducing transcription factors it  
51 is expressed in a wide variety of tissues and cell types, during embryogenesis and organ  
52 formation and in adult normal and pathological, and it is involved in EMT-related processes and  
53 overexpressed in numerous carcinoma. However, in contrast to other EMT-inducing transcription  
54 factors, Slug is expressed in adult stem/progenitor cells in normal epitheliums. Recently, it has  
55 been shown to control stem/progenitor cell growth during mammary gland morphogenesis (2) and  
56 to repress differentiation in epidermal progenitor cells (3). In the lung, Slug is expressed in  
57 spheroids of stem/progenitor cells isolated from human adult airway epithelia (4) and, by  
58 microarray analysis, it was found enriched in both mouse and human airway basal cells (5, 6).

59 Basal cells are the adult stem/progenitor cells of the airway epithelium: they can self-  
60 renew and/or differentiate to repair the epithelium after injury (7). These cells can be isolated  
61 from bronchial tissue and, when grown in an air-liquid interface (ALI) culture system,  
62 reconstitute the pseudostratified bronchial epithelium (8). In this system, basal cells keep the  
63 memory of the characteristics of their source tissue up to passage 3 to 4; e.g. when isolated from  
64 patients with Chronic Obstructive Pulmonary Disease (COPD), they reconstitute an epithelium  
65 with anomalies characteristic of COPD (9).

66 COPD is a respiratory disease characterized by a progressive and irreversible loss of  
67 respiratory capacity, with subjects at stage GOLD (Global initiative for chronic Obstructive Lung  
68 Disease) 1/A having mild symptoms and at GOLD 4/D having severe symptoms. One of the  
69 characteristics of COPD subjects is a remodeling of the airways with, in particular, many  
70 anomalies of the epithelium lining the airways such as basal cells hyperplasia, goblet cell  
71 metaplasia or squamous metaplasia (10, 11). Cigarette smoke is the main cause of COPD with  
72 80-90% of patient developing COPD being smokers. Several studies have shown that cells  
73 exposed to cigarette smoke keep the memory of the exposure and establish a "field of injury" all  
74 along the airway epithelium (12). The hypothesis is that the anomalies of the epithelium would  
75 result from an imbalance in the basal/progenitor cell fate, with this imbalance progressively  
76 worsening with the disease stage and leading to an increase of the extent of the anomalies. These  
77 deregulations are thought to be irreversible, since the anomalies are maintained even after  
78 subjects quit smoking (13). Noticeably, COPD subjects have an increased risk of lung cancer  
79 compared to non-COPD smokers, in particular of squamous carcinoma in the proximal bronchus  
80 (14, 15).

81 Our goal was to better understand Slug function in bronchial epithelium basal/progenitor  
82 cells. We hypothesized that Slug is involved in basal/progenitor cell fate i.e. self-renewal and  
83 differentiation, and, that its deregulation therefore leads to anomalies in the bronchial epithelium.  
84 Slug is a transcription factor and we focused on determining the downstream genes that it,  
85 directly or indirectly, regulates. The ALI cell culture system allows regenerating, from primary  
86 basal cells, a bronchial epithelium with characteristics close to the in vivo source tissue, providing  
87 a good model to characterize the genetic program that takes place during differentiation.

88 We used COPD subjects to compare with normal subjects as they present many anomalies in their  
89 bronchial epithelium that can be reproduced in the ALI cell culture system. Moreover, features of  
90 EMT have been reported in COPD airways (9, 16) and Transforming Growth Factor (TGF)- $\beta$  is  
91 found at higher levels in COPD lung tissues (17). We also wanted to characterize the effects of  
92 TGF- $\beta$ , since it has been shown to regulate Slug expression (18), to be, in certain conditions, an  
93 EMT-inducing factor (19), and to play a role in stem/progenitor cell fate (20), we also wanted to  
94 characterize its effects. We thus determines Slug expression and characterized its downstream  
95 genes in bronchial epithelial progenitor cells, comparing cells from normal and COPD subjects at  
96 the onset of differentiation in presence or absence of TGF- $\beta$ .

97

## 98 **Materials and methods**

### 99 **Study subjects and cell isolation**

100 Human lung tissues, non-COPD (non-smokers (n=6) and smokers (n=6)) and COPD  
101 (smokers (n=6) and Ex-smokers (n=6)) (see S1 Appendix for characteristics), were obtained from  
102 patients undergoing lung lobectomy for peripheral lung carcinoma for removal of a primary lung  
103 tumor and who gave informed consent. The study was approved by the ethics committee of Paris  
104 Nord, IRB 00006477 Paris 7 University, France. COPD patients were diagnosed according to the  
105 GOLD guidelines. Lung tissues used in this study were dissected as far away as possible from the  
106 tumor. Primary human bronchial epithelial cells were isolated from a piece of large bronchus  
107 according to standard protocol.

108

### 109 **Cell culture and ALI differentiation system**

110 Primary human bronchial epithelial cells (Passage 1 or 2) were expanded on flasks coated  
111 with collagen I (BD Biocoat) in bronchial epithelial growth medium (BEGM), composed of  
112 bronchial epithelial basal medium (BEBM) supplemented with the SingleQuots kit (Lonza) and  
113 incubated at 37°C in 5% de CO<sub>2</sub>. Cells were expanded and differentiated in ALI (Air Liquid  
114 Interface condition) according to Fulcher et al (8) with the following modifications: Cells  $\leq$ 90%  
115 confluent were plated in BEGM at a density of  $1.5 \times 10^5$  / cm<sup>2</sup> on Transwell cell culture inserts  
116 with a polyethylene (PET) membrane and 0.4  $\mu$ m pores (Corning Costar) coated with Collagen  
117 IV (Sigma). The next day, medium was replaced with ALI medium. Undifferentiated cells  
118 correspond to cells submerged and at day 3 post-plating. Cells at the onset of differentiation  
119 correspond to cells put in ALI condition (removal of the medium at the top of the culture) at day 3  
120 post-plating and further cultured for 6 days. TGF- $\beta$ 1 (Peprotech) was added at a concentration of  
121 1 ng/ml 2 days before the switch to ALI condition.

122

### 123 **shRNA lentivirus transduction**

124 Protocol for transduction was obtained from D. Bryant (21) and adapted as following:  
125 Cells were plated at a density of  $10^5$ /cm<sup>2</sup> in BEGM on Transwell cell culture inserts with a PET  
126 membrane and 0.4 $\mu$ m pores (Corning Costar) coated with Collagen IV (Sigma), and allow to  
127 adhere 3-4 h at 37°C, 5% CO<sub>2</sub>. shRNA lentiviral transduction particles from Mission RNAi  
128 TRC2 corresponding to SNAI2 specific or control non-targeting sequences (see S2 Appendix for  
129 sequence) were added on top of the cells at a MOI of 10. Inserts were swirled and placed O.N. at  
130 37°C, 5% CO<sub>2</sub>. Medium was diluted by half with BEGM and insert placed back at 37°C, 5% CO<sub>2</sub>  
131 for 1 day. Medium was replaced with ALI medium. At day 4 post-transduction, cells were

132 changed to ALI conditions. Cells were lysed for RNA or protein analysis at day 6 post-  
133 transduction.

134

## 135 **Immunofluorescence staining of cell layers**

136 All steps were done on a rocking table. Cells on inserts were rinsed with phosphate buffer  
137 saline (PBS)+ 1x, fixed with cold 4% paraformaldehyde in PBS+ for 10 min at 4°C, then  
138 permeabilized with 0.2% Triton-X100 in PBS for 10 min. For staining, blocking, incubations and  
139 washing were done with PFS (0.7% fish gelatin (Sigma) and 0.025% saponin in PBS 1x). Cells  
140 were first blocked with PFS for 30 min at room temperature, then incubated with primary  
141 antibodies at 4°C overnight. After extensive wash with PFS, cells were incubated at R.T. for 1 h  
142 with the corresponding Alexa Fluor conjugated secondary antibody at a dilution of 1:1000, then  
143 washed extensively. Cells were quickly rinsed twice with PBS 1x, adding Hoescht 33342 at 1  
144 µg/ml in the first wash. Filters with the cells were cut out and mounted between a glass slide and  
145 a coverslip using ProLong gold (Invitrogen). Slides were left a minimum of 48 h at room  
146 temperature before observation under the microscope. Slides were frozen at - 20°C for long term  
147 storage. (see S3 Appendix for antibody references).

148

## 149 **RNA extraction**

150 Cells were rinsed with phosphate buffer saline (PBS) before to be homogenized in RNA  
151 lysis buffer (NucleoSpin RNA Kit, Macherey-Nagel), supplemented with 1% β-  
152 Mercaptoethanol. Lysates were vortexed and proceeded immediately or snapped Frozen and  
153 stored at -80°C. Total RNA was extracted on column using the NucleoSpin RNA Kit (Macherey-

154 Nagel). DNase I treatment was done directly on the column. RNA concentration was determined  
155 using a NanoDrop.

156

## 157 **cDNA synthesis**

158 For each sample, 0.3  $\mu$ g of total RNA was reverse transcribed as previously described  
159 (22) with the following modifications: Briefly, total RNA was annealed with 0.1 mg/ml  
160 oligo(dT)15 primer (Promega) and cDNA synthesis was performed with M-MLV Reverse  
161 Transcriptase (Promega) for 1 h at 42°C. A control without reverse transcriptase was done for  
162 each series of cDNAs.

163

## 164 **Quantitative Real-Time Polymerase Chain Reaction (qPCR)**

165 Quantitative PCR was done on the QuantStudio 6 Flex with the QuantStudio Real-Time  
166 PCR software using SYBR green PCR master mix (Applied BioSystems). Primers (see S2  
167 Appendix for primer sequences) were designed to be used with an annealing temperature of 60°C  
168 and an elongation time of 1 min. For a given gene target, cDNA volume used was chosen to be in  
169 a Ct range from 20 to 30, using 0.125  $\mu$ M each forward and reverse primer. Glyceraldehyde-3-  
170 Phosphate Dehydrogenase (GAPDH) was used to normalize for cDNA amounts between  
171 samples.

172

## 173 **Protein extraction**



174 Cells were rinsed with cold Tris 20 mM pH 7.5 and lysed directly on inserts with RIPA  
175 buffer (Tris pH 7.5, 50 mM; NaCl, 150 mM, NP-40 (leg10) or Triton X-100, 1%: Sodium  
176 deoxycholate, 1%; SDS 0.1%). Cells were scrapped and lysates were placed on a wheel for 30  
177 min at 4°C. DNA was sheared with a needle and lysates spun down at 14K for 10 min at 4°C.  
178 Protein concentration in the lysates was determined using BCA protein assay (Pierce). Lysates  
179 were proceed immediately or snapped frozen and stored at -80°C.

180

## 181 **Reverse Phase Protein Array (RPPA)**

182 RPPA was done by the RPPA platform at Curie Institute on samples prepared in RIPA  
183 buffer (as described in protein extraction) and stored at -80°C. RPPA was done as following:  
184 Protein concentration was determined (Pierce BCA reducing agent compatible kit, ref 23252).  
185 Samples were printed onto nitrocellulose covered slides (Supernova, Grace Biolabs) using a  
186 dedicated arrayer (2470 arrayer, Aushon Biosystems). Five serial dilutions, ranging from 1000 to  
187 62.5 µg/ml, and four technical replicates per dilution were printed for each sample. Arrays were  
188 labeled with 32 specific antibodies, of which 8 were described in this study (see S3 Appendix for  
189 antibody references) or without primary antibody (negative control), using an Autostainer Plus  
190 (Dako). Briefly, slides were incubated with avidin, biotin and peroxydase blocking reagents  
191 (Dako) before saturation with TBS containing 0.1% Tween-20 and 5% BSA (TBST-BSA). Slides  
192 were then probed overnight at 4°C with primary antibodies diluted in TBST-BSA. After washes  
193 with TBST, arrays were probed with horseradish peroxidase-coupled secondary antibodies  
194 (Jackson ImmunoResearch Laboratories, Newmarket, UK) diluted in TBST-BSA for 1 h at RT.  
195 To amplify the signal, slides were incubated with Bio-Rad Amplification Reagent for 15 min at  
196 RT. The arrays were washed with TBST, probed with IRDye 800CW Streptavidin (LiCOR)

197 diluted in TBST-BSA for 1 h at RT and washed again in TBST. For staining of total protein,  
198 arrays were incubated 30 min Super G blocking buffer (Grace Biolabs), rinsed in water, incubated  
199 5 min in 0,000005% Fast green FCF (Sigma) and rinsed again in water. The processed slides  
200 were dried by centrifugation and scanned using a Innoscan 710-AL microarray scanner  
201 (Innopsys). Spot intensity was determined with MicroVigene software (VigeneTech Inc). All  
202 primary antibodies used in RPPA have been previously tested by Western Blotting to assess their  
203 specificity for the protein of interest. Raw data were normalized using Normacurve (23), which  
204 normalizes for fluorescent background per spot and a total protein stain.

205

## 206 **Gene expression profiling**

207 Microarray analysis was performed on biological triplicate samples. Total RNA were  
208 amplified and labeled before hybridization onto Affymetrix human Gene 2.1 ST GeneChip  
209 according the manufacturer, by the Genomics platform at Curie Institute, Paris (24). Array  
210 datasets were controlled using Expression console (Affymetrix) and further analyses and  
211 visualization were made using EASANA (GenoSplice, [www.genosplice.com](http://www.genosplice.com)), which is based on  
212 the FAST DB annotations (25, 26) Gene Array data were normalized using quantile  
213 normalization. Background corrections were made with antigenomic probes and probes were  
214 selected as described previously (27). Only probes targeting exons annotated from FAST DB  
215 transcripts were selected to focus on well-annotated genes whose mRNA sequences are in public  
216 databases (25, 26). Bad-quality selected probes (e.g., probes labeled by Affymetrix as ‘cross-  
217 hybridizing’) and probes whose intensity signal was too low compared to antigenomic  
218 background probes with the same GC content were removed from the analysis. Only probes with  
219 a DABG P value  $\leq 0.05$  in at least half of the arrays were considered for statistical analysis (27).

220 Only genes expressed in at least one compared condition were analyzed. To be considered  
221 expressed, the DABG P value had to be  $\leq 0.05$  for at least half of the gene probes. We performed  
222 an unpaired Student's t-test to compare gene intensities in the different biological replicates.  
223 Genes were considered significantly regulated when fold-change was  $\geq 1.2$  and P value  $\leq 0.05$ .  
224 Significant KEGG pathways (28), REACTOME pathways (29) and GO terms were retrieved  
225 using DAVID (30) from union of results of all, up- and down-regulated genes separately. Data set  
226 GEO ID numbers are GSE122957 and GSE123129.

227

## 228 **Image capture and analysis**

229 Images of cell layers stained by immunofluorescence were captured using a SP8 Leica  
230 confocal microscope equipped with a X 40 objective. The following excitation sources were  
231 used: a diode 405-nm, an argon laser 488-nm, a diode 561-nm, a diode 633-nm. Detectors were  
232 PMT and HyD. Digital images were analyzed using ImageJ software.

233

## 234 **Statistical Analysis**

235 Biological replicates were  $n \geq 11$  and data generated by at least 2 independent  
236 experiments. For RNA or protein levels, mean is  $\pm$ SD and statistical analysis was carried out by  
237 parametric paired or unpaired two-sided t-test as appropriate. For fold-change, mean is  $\pm$ SEM and  
238 statistical analysis was carried out by a one sample two-sided t-test. Correlations were computed  
239 as Pearson correlation coefficients and P value determined by two-sided test. Significance was  
240 accepted when P value  $< 0.05$ .

241

## 242 **Results**

### 243 **Slug/Snai2 is the only EMT-inducing transcription factor highly** 244 **expressed in basal cells and it co-expresses with epithelial and** 245 **mesenchymal markers**

246 Slug/Snai2 gene has been found by microarray analysis to be highly expressed in basal  
247 cells of the human airway epithelium (5, 6). To understand the role of Slug in these  
248 stem/progenitor cells, we used primary basal cells isolated from human bronchial epithelium and  
249 first characterized these cells for the expression of Slug.

250 We confirmed by immunocytochemistry that primary basal cells grown at confluence and  
251 maintained undifferentiated are all progenitor cells as shown by the expression of the marker p63,  
252 and that they all express Slug that co-localizes with p63 in their nuclei (**Fig 1A**). Similar  
253 expression profiles were obtained with cells from COPD subjects (**S1 Fig**). Slug is an EMT-  
254 inducing transcription factor and we also determined the expression of other transcription factors  
255 with this property. While Slug is highly expressed, the expression of Snail1 and Zeb1 is close to  
256 background and Twist1 does not exceed 10% of Slug levels, and this in both normal and COPD  
257 cells (**Fig 1B**). To determine the epithelial status of these progenitor cells, we studied the  
258 expression of epithelial and mesenchymal EMT-related markers. We found that among the genes  
259 coding for junction proteins, the epithelial marker E-cadherin (E-cad/CDH1) is expressed while  
260 N-cadherin (N-cad/CDH2), an EMT-related mesenchymal marker, is not expressed (**Fig 1C**). We  
261 also observed a high level of expression of the genes coding for the cytoskeletal proteins  
262 cytokeratin 5 (KRT5) and vimentin (Vim), respectively an epithelial and a mesenchymal marker,

263 as well as expression of ACTA2, the gene coding for the mesenchymal marker  $\alpha$ -smooth muscle  
264 actin (a-sma). (**Fig 1D**). In conclusion, both COPD and normal epithelial progenitors co-express  
265 epithelial and mesenchymal markers.

266 **Fig 1. Bronchial epithelial progenitors express Slug in their nuclei and co-express epithelial and mesenchymal**  
267 **markers.**

268 Primary bronchial epithelial basal cells were grown on filters and analyzed undifferentiated at confluence, either by  
269 fluorescent immunocytochemistry (A) or by RT-qPCR (B-D). (A) Normal cells were fixed and labeled  
270 simultaneously with progenitor cell marker p63 (white) and Slug (green) antibodies and with Hoechst as a marker of  
271 nuclei (blue). Bars are 20  $\mu$ m. (B-D) RNA were extracted from normal and COPD cells and analyzed by RT-qPCR.  
272 GAPDH was used to normalize cDNA amounts between samples and results were calculated as a ratio on GAPDH.  
273 Data are for  $n \geq 11$  and experiments were done at least in duplicate. (B) Expression of the EMT-inducing  
274 transcription factors Snail, Twist1 and Zeb1 shown as a percentage of Slug mRNA, with mean  $\pm$ SEM (C)  
275 Expression of the mesenchymal marker N-cad/CDH2 shown as a percentage of the epithelial marker E-cad/CDH1  
276 mRNA, with mean  $\pm$ SEM (D) mRNA levels of KRT5 gene, an epithelial cytoskeletal marker and ACTA 2 and Vim  
277 genes, mesenchymal cytoskeletal markers. Results shown are log2 (ratio on GAPDH) and are presented as a scatter  
278 plot with the mean  $\pm$ SD. ns: non significant.

279

280 **Slug/Snail2 expression is increased in COPD cells when compared to**  
281 **normal cells at the onset of differentiation in presence of TGF- $\beta$ .**

282 We then determined the expression of Slug and the EMT-related markers in cells induced  
283 to differentiate using the ALI cell culture system that allows basal/progenitor cells to differentiate  
284 into a characteristic bronchial pseudostratified epithelium. The complete differentiation takes 3 to  
285 4 weeks in this system. However, we were interested in the onset of the genetic differentiation  
286 program and therefore studied the early timepoints. TGF- $\beta$  can play a role in stem/progenitor cell  
287 fate (20); it also regulates Slug expression, is a potential EMT-inducing factor and is expressed at

288 higher levels in COPD airways compared to normal (17, 18). We thus compared the expression of  
289 Slug and the EMT-related markers at the onset of differentiation in absence or presence of TGF- $\beta$   
290 to determine if progenitor cells from normal and COPD responded differently to TGF- $\beta$ . We used  
291 low concentration of TGF- $\beta$  (1ng/ml) to be in conditions similar to the physiological range.

292 TGF- $\beta$  significantly increases Slug mRNA expression while its effect on the expression of  
293 E-cad/CDH1 is not statistically significant. Slug remains the most highly expressed EMT-  
294 inducing transcription factor and among the cell-cell junction markers, E-cad/CDH1 is still the  
295 most expressed when compared to the mesenchymal marker N-cad/CDH2. Similar effects are  
296 found for both normal and COPD cells (**Fig 2 A-B and D-E**). Immunocytochemistry shows that  
297 while Slug is expressed in the nuclei and E-cad is mainly expressed at the cell-cell junctions in  
298 cells at the onset of differentiation, TGF- $\beta$  leads to delocalization of E-cad to the cytoplasm, with  
299 similar profiles of expression being observed in normal and COPD cells (**S2A-D Fig**). Among the  
300 cytoskeletal markers, Vim is highly upregulated by TGF- $\beta$ , while KRT5 and ACTA2 levels do  
301 not change significantly. Similar effects are observed in normal and COPD cells (**Fig 2C**).

302 **Fig 2. Effect of TGF- $\beta$  on Slug and EMT-associated markers in normal and COPD bronchial epithelial**  
303 **progenitors.**

304 Primary bronchial epithelial basal cells, normal and COPD, were grown on filters and at confluence changed to ALI  
305 culture to induce differentiation, without TGF- $\beta$  or in presence of 1ng/ml of TGF- $\beta$ . Cells were analyzed at day 6 of  
306 ALI culture for mRNA expression. RNA were extracted from normal and COPD cells and analyzed by RT-qPCR.  
307 GAPDH was used to normalize cDNA amounts between samples and results were calculated as a ratio on GAPDH.  
308 Data shown represent the mean for  $n \geq 11$ , and experiments were done at least in duplicate. (A-C) Results are  
309 presented as the fold-change induced by TGF- $\beta$  on mRNA expression of Slug (A), E-cad/CDH1 (B) and genes  
310 coding for cytoskeletal proteins (C) with mean  $\pm$ SEM, and compare normal and COPD cells. (D) Expression of the  
311 EMT-inducing transcription factors Snail1, Twist1 and Zeb1 shown as a percentage of Slug mRNA, with mean  
312  $\pm$ SEM. (E) Expression of the mesenchymal marker N-cad/CDH2 shown as a percentage of the epithelial marker E-

313 cad/CDH1 mRNA, with mean  $\pm$ SEM. Statistical significance is at P value  $< 1.00E-03$  \*\*\* as indicated. ns: non  
314 significant.

315 In response to TGF- $\beta$ , the resulting levels of Slug mRNA are similar in normal and COPD  
316 cells, and this is also the case for E-cad/CDH1 and Vim mRNA (**Fig 3A**). However, when we  
317 determined the expression at the protein level by Reverse Phase Protein Array (RPPA), which  
318 allows studying all the samples simultaneously, thus, reducing variability due to technical bias  
319 (31), we found that TGF- $\beta$  leads to significantly higher levels of Slug in COPD cells. E-cad  
320 protein levels are also higher in COPD in presence of TGF- $\beta$ , while Vim levels do not differ  
321 significantly between normal and COPD cells (**Fig 3B**). Both in normal and COPD cells, and in  
322 absence or presence of TGF- $\beta$ , a strong positive correlation between Slug and E-cad protein  
323 levels is observed (**Fig 3C**). These results indicate that Slug is deregulated in COPD  
324 basal/progenitor cells at the onset of differentiation in presence of TGF- $\beta$ .

325 **Fig 3. Slug, E-cad/CDH1 and Vim expression in normal and COPD bronchial epithelial progenitors.**

326 Primary bronchial epithelial basal cells, normal and COPD, were grown on filters and at confluence changed to ALI  
327 culture to induce differentiation, without TGF- $\beta$  or in presence of 1ng/ml of TGF- $\beta$ . Cells were analyzed at day 6 of  
328 ALI culture either for mRNA expression (A) or for protein expression (B-C). (A) Comparison of the mRNA levels in  
329 normal and COPD cells in presence of TGF- $\beta$  of Slug, E-cad/CDH1 and Vim. RNA were extracted from normal and  
330 COPD cells and analyzed by RT-qPCR. GAPDH was used to normalize cDNA amounts between samples and results  
331 were calculated as a ratio on GAPDH. Data are for  $n \geq 11$  with experiments done at least in duplicate and results are  
332 shown as log<sub>2</sub> (ratio on GAPDH) and presented as a scatter plot with the mean  $\pm$ SD. (B-C) Comparison of the  
333 protein levels in normal and COPD cells in absence or presence of TGF- $\beta$ , of Slug, E-cad and Vim. Proteins lysates  
334 were prepared from normal and COPD cells and analyzed by RPPA. Data shown are for  $n \geq 11$ . (B) Protein levels are  
335 shown as log<sub>2</sub> (values) and are presented as scatter plots with the mean  $\pm$ SD. (C) Correlations between Slug and E-  
336 cad protein levels in absence or presence of TGF- $\beta$  for normal and COPD cells. □ Results are Pearson correlations  
337 calculated with log<sub>2</sub> (expression levels) and are presented as scatter plots with a regression line. Statistical  
338 significance is at P value  $< 1.00E-02$  \*\* or  $< 1.00E-03$  \*\*\* as indicated. ns: non significant.

339

340 **Microarray analysis of Slug knockdown identifies genes involved in**  
341 **proliferation that are repressed downstream of Slug in normal but**  
342 **not COPD cells**

343 We found that Slug responds differently to TGF- $\beta$  in normal and COPD bronchial  
344 progenitor cells and that it does not repress E-cad in either cell type. To better understand Slug  
345 function in these progenitor cells, we wanted to identify the genes downstream of Slug and to  
346 determine if these genes were different between normal and COPD cells. It has been reported that  
347 the expression level of Slug determines the differentiation status of keratinocytes (3), and we  
348 chose a Slug knockdown approach rather than an overexpression that could also change Slug  
349 specificity, therefore its downstream genes, in our cell model. We knocked down Slug in normal  
350 and COPD cells using shRNA from Mission RNAi that were validated and selected the most  
351 efficient shRNA that was within the coding strand in order to limit non-specific downstream  
352 genes (32). To determine the genes whose expression was modified by Slug knockdown  
353 compared to a control siRNA, we performed a total RNA microarray analysis. We used an  
354 Affymetrix human Gene 2.1 ST GeneChip, that allows to test >30,000 coding transcripts and  
355 11,000 long intergenic non-coding transcripts.

356 Slug Knockdown resulted in a statistically significant decrease of Slug mRNA with  
357 knockdown levels determined by RT-qPCR of 43% (fold-change 1.77, P value <1.00E-04) and  
358 54% (fold-change 2.17, P value 4.20E-03), respectively for normal and COPD cells. Slug  
359 knockdown level was low, however within the range expected for all Mission RNAi validated  
360 Slug sequences. Microarray analysis gave lower fold-change for Slug: 1.48 (P value 1.36E-02)



361 and 1.39 (P value 8.96E-03), respectively for normal and COPD samples, and for this reason we  
362 chose to set the minimum fold-change threshold at 1.2, instead of 1.5 usually used, for selecting  
363 genes among those with a statistically significant change of expression (P value  $\leq 5.00E-02$ ). We  
364 focused on the genes in normal cells with an expression significantly changed according to these  
365 criteria. Among the 805 genes identified downstream of Slug in normal cells, there is a majority  
366 (514/63.9%) of upregulated, i.e. genes that would be repressed directly or indirectly by Slug. This  
367 is coherent with Slug being a repressor (33, 34). Since we found that Slug expression is  
368 deregulated in COPD cells at the onset of differentiation in presence of TGF- $\beta$ , we were  
369 particularly interested in genes responding to differentiation and TGF- $\beta$ . To identify these genes,  
370 we also performed a microarray analysis on RNA from basal cells at the onset of differentiation,  
371 in presence or absence of TGF- $\beta$ , using undifferentiated cells as control. **S1 Table** is the list of  
372 the 514 genes upregulated in normal cells with their fold change in normal and COPD cells  
373 knocked down for Slug as well as their respective response to differentiation or TGF- $\beta$ . Setting  
374 the minimum fold-change at 1.2, we found that 398 of these genes (77.4%, a large majority)  
375 respond to differentiation and/or TGF- $\beta$  and, among these 193 (48.5%) respond to both. We  
376 selected the genes responding to both differentiation and TGF- $\beta$  and classified them in 4 groups  
377 according to their combined type of response. **Fig 4A** shows histograms representing the number  
378 of genes for each group and small bars indicating the mean fold-increase induced by Slug  
379 knockdown for these genes in normal (blue) and COPD (red) cells. The large majority of the  
380 genes are repressed by TGF- $\beta$  and among these, genes that are upregulated during differentiation  
381 have a similar mean fold-increase induced by Slug knockdown in normal and COPD cells. In  
382 contrast, the 68 genes that are downregulated during differentiation have a much lower mean  
383 fold-increase in COPD than in normal cells. These genes are thus repressed by Slug upon

384 differentiation of TGFbeta in normal cells, but this repression is lost in COPD cells. A search for  
385 enriched gene pathways using KEGG, REACTOME and Gene Ontology (GO) databases revealed  
386 that 45 out of these 68 genes are involved in processes related to proliferation or cell cycle. **Table**  
387 **1** shows that all these 45 genes, except for 3, are much less or not repressed downstream of Slug  
388 in COPD compared to normal cells.

389 We further studied the expression of 5 of these proliferation-related genes and first  
390 confirmed by RT-qPCR the difference in the fold change between normal and COPD cells; we  
391 also studied E-cad/CDH1, cytokeratin 5/KRT5 and Vim/VIM genes that were not among the 514  
392 genes significantly increased by Slug knockdown in normal cells. **Fig 4B** shows the correlation  
393 between microarray and RT-qPCR values for these 8 genes in both normal and COPD cells. The  
394 strong correlation ( $r^2$  values of 0.9318 and 0.8671, respectively for normal and COPD), validates  
395 the microarray analysis and also confirms that the 5 proliferation-related genes are upregulated by  
396 Slug knockdown in normal but not COPD cells. No significant effect of Slug knockdown is seen  
397 on CDH1 and KRT5 expression, while VIM expression decreases significantly and similarly for  
398 normal and COPD. This confirms that CDH1/E-cad is not a target of Slug in bronchial progenitor  
399 cells from both normal and COPD. KRT5 is also not regulated downstream of Slug, while in  
400 contrast, VIM is induced downstream of Slug and similarly in cells from normal and COPD  
401 subjects.

402 **Table 1. List of 45 proliferation genes upregulated by Slug knockdown in normal bronchial**  
 403 **basal/progenitor cells.**

| Gene Symbol          | KD Normal (Mean)   |          | KD COPD (Mean)     |          |
|----------------------|--------------------|----------|--------------------|----------|
|                      | Fold-Change (log2) | P-value  | Fold-Change (log2) | P-value  |
| DTL                  | 0.98               | 1.06E-02 | 0.11               | 3.05E-01 |
| NCAPH                | 0.93               | 4.21E-02 | -0.06              | 8.26E-01 |
| CCNA2                | 0.87               | 4.62E-03 | 0.12               | 4.06E-01 |
| UHRF1                | 0.87               | 6.60E-03 | -0.04              | 8.24E-01 |
| ASPM                 | 0.86               | 1.57E-02 | 0.12               | 1.80E-01 |
| FOXM1 // NRIP2       | 0.83               | 3.41E-02 | 0.11               | 4.89E-01 |
| MCM10                | 0.77               | 3.66E-02 | 0.65               | 4.10E-02 |
| FAM83D               | 0.75               | 1.40E-04 | 0.21               | 5.20E-01 |
| CKAP2L               | 0.75               | 6.06E-03 | -0.11              | 6.37E-01 |
| FBXO5                | 0.72               | 4.98E-02 | 0.01               | 8.72E-01 |
| CASC5                | 0.71               | 3.04E-02 | 0.31               | 1.94E-01 |
| TYMS                 | 0.68               | 3.04E-02 | 0.00               | 9.90E-01 |
| PCNA                 | 0.67               | 3.02E-03 | 0.26               | 3.54E-02 |
| PRC1                 | 0.65               | 4.02E-03 | 0.07               | 6.53E-01 |
| MKI67                | 0.64               | 4.47E-02 | -0.08              | 5.01E-01 |
| CEP55                | 0.61               | 1.02E-02 | -0.16              | 3.03E-01 |
| CENPE                | 0.60               | 3.02E-02 | 0.18               | 5.11E-01 |
| MIS18A               | 0.59               | 2.23E-02 | 0.26               | 4.04E-01 |
| FANCI                | 0.59               | 2.26E-02 | 0.08               | 6.87E-01 |
| GPSM2                | 0.54               | 1.16E-03 | 0.20               | 1.45E-01 |
| BORA                 | 0.54               | 3.05E-02 | 0.15               | 5.95E-01 |
| CENPF                | 0.54               | 9.86E-03 | -0.10              | 4.00E-01 |
| DLGAP5               | 0.54               | 2.38E-02 | -0.19              | 2.71E-01 |
| AURKB                | 0.51               | 5.20E-04 | 0.33               | 1.15E-01 |
| KIF20A               | 0.51               | 2.55E-02 | 0.11               | 4.57E-01 |
| KIF20B               | 0.51               | 2.56E-02 | -0.01              | 9.41E-01 |
| UBE2C                | 0.50               | 2.10E-02 | 0.32               | 3.89E-01 |
| CDC20                | 0.49               | 3.58E-03 | 0.07               | 7.63E-01 |
| CCNB1                | 0.48               | 4.94E-02 | -0.03              | 6.89E-01 |
| GINS1                | 0.48               | 1.35E-02 | -0.08              | 7.93E-01 |
| FANCD2               | 0.46               | 6.88E-03 | 0.25               | 2.54E-02 |
| SKA2                 | 0.44               | 2.55E-02 | 0.11               | 5.64E-01 |
| HELLS                | 0.43               | 3.01E-02 | -0.11              | 1.53E-01 |
| CKS2                 | 0.43               | 3.29E-02 | -0.15              | 4.78E-01 |
| NASP                 | 0.41               | 3.34E-02 | 0.12               | 3.31E-02 |
| ALDH3A1              | 0.40               | 1.53E-02 | 1.12               | 1.46E-03 |
| FEN1                 | 0.38               | 2.94E-02 | 0.37               | 1.06E-01 |
| RFC4                 | 0.37               | 4.18E-02 | 0.11               | 6.10E-01 |
| HIST2H4A // HIST2H4B | 0.34               | 1.02E-03 | 0.49               | 2.03E-01 |
| HJURP                | 0.32               | 1.72E-02 | 0.10               | 7.84E-01 |
| CDKN3                | 0.32               | 3.37E-02 | -0.04              | 5.49E-01 |
| PIR // VEGFD         | 0.30               | 4.13E-02 | 0.10               | 5.06E-01 |
| PRIM1                | 0.30               | 3.66E-03 | -0.10              | 4.67E-01 |
| RNASEH2A             | 0.29               | 1.09E-02 | 0.04               | 5.42E-01 |
| CDCA7L               | 0.28               | 1.14E-02 | -0.06              | 6.18E-01 |

404 Genes statistically significant upregulated by Slug knockdown in normal cells and downregulated by both  
 405 differentiation and TGF- $\beta$ .

406 Genes were selected for a log<sub>2</sub> (fold-Change)  $\geq$  0.26. Statistical significance is at P value < 5.00E-02

407 Comparison with fold-change for Slug knockdown in COPD cells.

408

409 **Fig 4. Microarray analysis of Slug knockdown identifies proliferation genes repressed in normal**

410 **bronchial epithelial progenitors.**

411 Knockdown with shRNA specific of Slug were performed on primary bronchial epithelial basal cells, normal and  
412 COPD, Knockdown cells were grown on filters and, at confluence, changed to ALI culture to induce differentiation.  
413 Cells were analyzed at day 2 of ALI culture for mRNA expression. RNA were extracted from normal and COPD  
414 cells and analyzed by microarray analysis on an Affymetrix chip. Data are for  $n \geq 3$  each, normal and COPD. (A)  
415 Genes significantly upregulated by Slug knockdown in normal cells and responding to both differentiation and TGF-  
416  $\beta$  were classified in 4 groups according to their response to differentiation and TGF- $\beta$ . Histograms represent the  
417 number of genes in each group with genes upregulated by TGF- $\beta$  in red and genes downregulated by TGF- $\beta$  in green,  
418 and genes upregulated during differentiation as checkboard and genes downregulated during differentiation as  
419 oblique lines. Horizontal bars represent the mean fold-increase for each group of genes, in blue for normal cells and  
420 in red for COPD cells. (B) Validation of microarray by RT-qPCR and comparison of Slug knockdown effect in  
421 normal (blue) and COPD (red) cells for CDH1, KRT5 and VIM genes as well as proliferation-related genes. Results  
422 are Pearson correlations calculated with  $\log_2$  (fold-change) and are presented as scatter plots with regression line and  
423 R-square values.

424

425

426 **TGF- $\beta$  represses the expression of proliferation-related genes in**  
427 **progenitor cells at the onset of differentiation and Slug is involved in**  
428 **this repression in normal but not in COPD cells.**

429 We found a set of proliferation-related genes that have an increased expression following  
430 Slug knockdown in normal but not in COPD cells; this suggests that these genes are directly or  
431 indirectly repressed by Slug in normal cells but that this regulation does not take place in COPD.  
432 This is supported by the strong and statistically significant inverse correlation between Slug and  
433 the mRNA levels of these genes that is observed in undifferentiated normal but not COPD cells  
434 (**Table 2**). Moreover, in normal cells, in addition to Ki67 mRNA, a strong inverse correlation also

435 exists between Slug and Ki67 protein, a widely used marker strictly related to proliferation (35)  
 436 **(Fig 5A)**. These correlations are found with Slug mRNA and not with the protein.

437 **Table 2. Correlation between proliferation genes and Slug in normal and COPD**  
 438 **undifferentiated basal cells**

|                   | Normal              |                   | COPD                |                   |
|-------------------|---------------------|-------------------|---------------------|-------------------|
|                   | Slug mRNA           | Slug Protein      | Slug mRNA           | Slug Protein      |
| <b>PRC1 mRNA</b>  | - 0.7331 (6.70E-03) | 0.3264 (3.27E-01) | - 0.2567 (4.46E-01) | 0.3178 (3.41E-01) |
| <b>FOXM1 mRNA</b> | - 0.7680 (3.50E-03) | 0.3295 (3.23E-01) | - 0.3640 (2.71E-01) | 0.2530 (4.53E-01) |
| <b>CCNA2 mRNA</b> | - 0.7615 (4.00E-03) | 0.3514 (2.89E-01) | - 0.1772 (6.02E-01) | 0.2739 (4.15E-01) |
| <b>PCNA mRNA</b>  | - 0.7365 (6.30E-03) | 0.3437 (3.01E-01) | 0.0286 (9.33E-01)   | 0.0519 (8.80E-01) |
| <b>KI67 mRNA</b>  | - 0.7322 (6.80E-03) | 0.3329 (3.17E-01) | - 0.1092 (7.49E-01) | 0.0833 (8.08E-01) |

439 Pearson correlation coefficients and associated P value between expression levels.  
 440 Computation was performed on log2 of values.  
 441 Statistical significance was determined with a two-sided t-test. Correlations are significant at P value <  
 442 5.00E-02.  
 443

444 At the expression level in undifferentiated cells, only Ki67 mRNA is statistically  
 445 significant higher in COPD when compared to normal cells, and other proliferation-related genes  
 446 show only a tendency in the same direction **(Fig 5B)**. However, in cells at the onset of  
 447 differentiation in presence of TGF- $\beta$ , significant lower levels are found in normal cells including  
 448 for Ki67 protein, with the exception of PCNA that shows only a weak not statistically significant  
 449 tendency **(Fig 5C)**. TGF- $\beta$  decreases the expression of these proliferation-related genes and its  
 450 mean effect is in accordance with the mean difference of their expression levels between normal  
 451 and COPD cells **(Fig 5D)**.

452 To determine the implication of Slug in the repression of the proliferation-related gene  
 453 expression by TGF- $\beta$  in normal cells, we analyzed the correlation between Slug and these genes.  
 454 **Table 3 and Fig 5E** show that in normal cells, there are significant inverse correlations between  
 455 the combined effects of differentiation and TGF- $\beta$  on Slug and the proliferation-related gene  
 456 mRNA levels, except for PCNA. A good tendency for an inverse correlation is also found for  
 457 Ki67 protein. No such inverse correlations are found in COPD cells, showing that Slug is

458 involved in the repression of the proliferation-related gene expression by TGF- $\beta$  in normal cells  
 459 but that this function of Slug is lost in COPD cells.

460 **Table 3. Correlation between the effect of differentiation and TGF- $\beta$  on proliferation genes and on**  
 461 **Slug in normal and COPD basal/progenitor cells**  
 462

|                   | Normal                     |                     | COPD              |                          |
|-------------------|----------------------------|---------------------|-------------------|--------------------------|
|                   | Slug mRNA                  | Slug Protein        | Slug mRNA         | Slug Protein             |
| <b>PRC1 mRNA</b>  | <b>- 0.6983</b> (1.15E-02) | - 0.4189 (2.00E-01) | 0.4013 (2.21E-01) | <b>0.6755</b> (2.25E-02) |
| <b>FOXM1 mRNA</b> | <b>- 0.6003</b> (3.91E-02) | - 0.3884 (2.38E-01) | 0.5383 (8.76E-02) | <b>0.8093</b> (2.50E-03) |
| <b>CCNA2 mRNA</b> | <b>- 0.7056</b> (1.04E-02) | - 0.3021 (3.67E-01) | 0.3527 (2.87E-01) | 0.5576 (7.47E-02)        |
| <b>PCNA mRNA</b>  | - 0.2238 (4.84E-01)        | - 0.1194 (7.27E-01) | 0.2448 (4.68E-01) | 0.1919 (5.72E-01)        |
| <b>KI67 mRNA</b>  | <b>- 0.5840</b> (4.62E-02) | - 0.4359 (1.80E-01) | 0.2768 (4.10E-01) | 0.5275 (9.54E-02)        |

463 Pearson correlation coefficients and associated P value between the effect of differentiation and TGF- $\beta$ .  
 464 Statistical significance was determined with a two-sided t-test. Correlations are significant at P value <  
 465 5.00E-02  
 466

467 **Fig 5. Proliferation genes are more repressed by TGF- $\beta$  in normal bronchial epithelial progenitors than in**  
 468 **COPD.**

469 Primary bronchial epithelial basal cells, normal and COPD, were grown on filters and analyzed undifferentiated at  
 470 confluence or grown on filters and at confluence changed to ALI culture to induce differentiation, without TGF- $\beta$  or  
 471 in presence of 1 ng/ml of TGF- $\beta$ . Cells were analyzed undifferentiated or at day 6 of ALI culture either for mRNA or  
 472 for protein expression. RNA or proteins lysates were prepared from normal and COPD cells and analyzed  
 473 respectively by RT-qPCR and RPPA. For RT-qPCR, GAPDH was used to normalize cDNA amounts between  
 474 samples and results were calculated as a ratio on GAPDH. Data shown are for  $n \geq 11$ . □□□□Correlations between  
 475 Slug mRNA and Ki67 mRNA and protein levels in undifferentiated normal cells. □Results are Pearson correlations  
 476 calculated with log<sub>2</sub> (expression levels) and are presented as scatter plots with a regression line. (B, C) Comparison  
 477 of the mRNA levels of proliferation-related genes and protein levels of Ki67 between normal and COPD cells,  
 478 undifferentiated (B), at the onset of differentiation without TGF- $\beta$  or in presence of 1 ng/ml of TGF- $\beta$  (C). Results  
 479 shown are log<sub>2</sub> (ratio on GAPDH) for mRNA or log<sub>2</sub> (values) for protein and are presented as a scatter plot with the  
 480 mean  $\pm$ SD. (D) Comparison of TGF- $\beta$  effect on the expression of proliferation-related genes and proliferation marker  
 481 Ki67 protein between normal and COPD cells. Results are presented as the fold-change induced by TGF- $\beta$  on mRNA  
 482 expression with mean  $\pm$ SEM. (E, F) Correlations between Ki67, mRNA or protein, and Slug mRNA in normal cells

483 (E) or Slug protein in COPD cells (F) for the effect of differentiation and TGF- $\beta$ . Results are Pearson correlations  
484 calculated with the level of effect and are presented as scatter plots with a regression line. Statistical significance is at  
485 P value < 5.00E-02 \*, < 1.00E-02 \*\* or < 1.00E-03 \*\*\* as indicated. ns: non significant.

486

## 487 **The higher levels of Slug protein and of proliferation-related genes** 488 **observed in COPD progenitor cells are differently induced by TGF- $\beta$**

489 Slug protein and proliferation-related gene levels are higher in COPD cells in presence of  
490 TGF- $\beta$  (**Fig 3B and Fig 5C**) and, in contrast to normal cells, positive correlations, significant or  
491 with a good tendency, are observed between the combined effects of differentiation and TGF- $\beta$   
492 on Slug protein levels and that on the proliferation-related gene levels, with the exception of  
493 PCNA. A strong positive correlation is also found between Slug and Ki67 protein (**Table 3 and**  
494 **Fig 5F**). To understand the link between the higher expression of Slug protein and of the  
495 proliferation-related gene in COPD progenitor cells in presence of TGF- $\beta$ , we determined the  
496 expression of signaling pathways downstream of TGF- $\beta$ , using RPPA. In addition to the  
497 canonical TGF- $\beta$  signaling pathway Smad3-dependent, we also considered  $\beta$ -catenin ( $\beta$ -cat)  
498 signaling pathway known to crosstalk with Smad signaling and to be involved in proliferation  
499 (36). While TGF- $\beta$  increases the level of phosphorylation of Smad3, i.e. activates Smad3-  
500 dependent pathway, both in normal and COPD cells and at similar levels, it turns on  $\beta$ -cat  
501 signaling (i.e. decreases phosphorylation of  $\beta$ -cat) only in COPD. In addition, TGF- $\beta$  increases  
502 the levels of total Smad3 and  $\beta$ -cat also only in COPD (**Fig 6 A and B**).

503 Slug protein levels correlate positively with both total Smad3 and  $\beta$ -cat levels, but do not  
504 correlate with the phosphorylation levels of Smad3 or  $\beta$ -cat (**Fig 6C and D**). In contrast, a  
505 positive correlation, significant or as a strong tendency, is found between the activation of  $\beta$ -cat

506 (i.e. decrease of  $\beta$ -cat phosphorylation) and the levels of Ki67 protein and of the proliferation-  
 507 related genes, with the exception of PCNA (Table 4, Fig 6E). These results show that, in COPD  
 508 cells, the higher levels of Slug protein and of the proliferation-related gene expression found in  
 509 presence of TGF- $\beta$ , are induced by TGF- $\beta$  through different downstream pathways.

510 **Table 4. Correlation between proliferation genes and Smad3 or  $\beta$ -cat in COPD basal/progenitor**  
 511 **cells in presence of TGF- $\beta$ .**

|                   | Smad3               |                   | $\beta$ -catenin           |                          |
|-------------------|---------------------|-------------------|----------------------------|--------------------------|
|                   | Phospho/Total       | Total             | Phospho/Total              | Total                    |
| <b>PRC1 mRNA</b>  | - 0.1911 (5.74E-01) | 0.3377 (3.10E-01) | - <b>0.6551</b> (2.87E-02) | <b>0.7683</b> (5.70E-03) |
| <b>FOXM1 mRNA</b> | - 0.2244 (5.07E-01) | 0.291 (3.85E-01)  | - <b>0.6511</b> (3.00E-02) | <b>0.6877</b> (1.94E-02) |
| <b>CCNA2 mRNA</b> | - 0.2726 (4.17E-01) | 0.3709 (2.62E-01) | - <b>0.5391</b> (8.70E-02) | <b>0.7667</b> (5.90E-03) |
| <b>PCNA mRNA</b>  | - 0.1091 (7.49E-01) | 0.314 (3.47E-01)  | - 0.3975 (2.26E-01)        | <b>0.6769</b> (2.22E-02) |
| <b>KI67 mRNA</b>  | - 0.2256 (5.05E-01) | 0.2769 (4.10E-01) | - <b>0.7155</b> (1.33E-02) | <b>0.7872</b> (4.00E-03) |

512 Pearson correlation coefficients and associated P value between protein levels (phosphorylated/Total or  
 513 Total). Computation was performed on log2 of values.  
 514 Statistical significance was determined with a two-sided t-test. Correlations are significant at P value <  
 515 5.00E-02  
 516

517 **Fig 6. In COPD, TGF- $\beta$  induced higher levels of Slug protein and proliferation genes through different**  
 518 **pathways.**

519 Primary bronchial epithelial basal cells, normal and COPD, were grown on filters and at confluence changed to ALI  
 520 culture to induce differentiation, without TGF- $\beta$  or in presence of 1 ng/ml of TGF- $\beta$ . Cells were analyzed at day 6 of  
 521 ALI culture for protein expression. Proteins lysates were prepared from normal and COPD cells and analyzed by  
 522 RPPA. Data shown are for n  $\geq$  11. (A-B) Comparison of TGF- $\beta$  effect on the ratio Phospho/Total or total protein  
 523 expression levels of Smad3 (A) and  $\beta$ -cat □B□ between normal and COPD cells. Results are presented as the fold-  
 524 change induced by TGF- $\beta$  with mean  $\pm$ SEM. □C-E□□ Correlations between Smad3 or  $\beta$ -cat and Slug or Ki67  
 525 protein levels in COPD cells in presence of TGF- $\beta$ . Smad3 (Total protein level or ratio Phospho/Total) and Slug  
 526 protein levels (C),  $\beta$ -cat (Total protein level or ratio Phospho/Total) and Slug protein levels (D) or Ki67 protein levels  
 527 (E). Results are Pearson correlations calculated with log2 (expression levels) or log2 (Ratio Phospho/Total) and are  
 528 presented as scatter plots with a regression line. Statistical significance is at P value < 5.00E-02 \*, < 1.00E-02 \*\* or  
 529 < 1.00E-03 \*\*\* as indicated. ns: non significant.

530



## 531 **Discussion**

532           In this work, we show that in bronchial basal/progenitor cells, Slug is co-expressed with  
533 epithelial and mesenchymal markers and that, despite being highly expressed in the cell nuclei, it  
534 does not repress E-cad, even in presence of TGF- $\beta$ , and this in normal cells as well as COPD cells  
535 that have been described to reconstitute a bronchial epithelium with anomalies and features of  
536 EMT (9). Using a Slug knockdown approach and comparing between normal and COPD cells the  
537 genes downstream of Slug that respond to both differentiation and TGF- $\beta$ , we identified a large  
538 set of genes involved in cell cycle and proliferation that are directly or indirectly repressed targets  
539 of Slug in normal but not in COPD basal/progenitor cells. By comparing the expression of several  
540 of these genes between normal and COPD cells, we found that their mRNA levels as well as Ki67  
541 protein levels are lower in normal cells at the onset of differentiation when in presence of TGF- $\beta$ .  
542 We also found a negative correlation between the effect of TGF- $\beta$  on their expression and that on  
543 Slug at the onset of differentiation in normal cells, while in contrast, a mild positive correlation  
544 was observed in COPD. This shows that normal and COPD basal/progenitor cells respond  
545 differently to TGF- $\beta$ , with Slug being involved in the repression of proliferation genes by TGF- $\beta$   
546 in normal cells, while this function of Slug is lost in COPD.

547           Bronchial basal/progenitor cells express both epithelial and mesenchymal markers  
548 simultaneously, both in normal and COPD cells and similarly in presence of TGF- $\beta$ . In  
549 mammary stem cells a co-expression of epithelial and mesenchymal markers has also been  
550 reported leading to the concept of hybrid phenotype (37, 38). In our studies, apart from Slug, only  
551 the mesenchymal marker VIM is highly induced by TGF- $\beta$  in normal and COPD cells, resulting  
552 in similar levels in both cell type. This induction of VIM expression is coherent with our finding  
553 that it belongs to the genes that are induced downstream of Slug and that it is induced at similar

554 levels in normal and COPD cells. These results are in agreement with a report showing that Slug  
555 is important for the up-regulation of Vim by TGF- $\beta$  in epithelial cells (18). On the contrary, E-  
556 cad/ CDH1 gene is not among the genes whose expression is modified by Slug knockdown,  
557 confirming that it is not a target of Slug in bronchial basal/progenitor cells. Co-expression of Slug  
558 and E-cad have also been reported in mammary stem cells (39). In our study, we observe a  
559 positive correlation between Slug and E-cad proteins in all conditions tested, indicating that Slug  
560 does not repress E-cad in these cells even in COPD and in presence of TGF- $\beta$ . Several studies  
561 have reported features of EMT in COPD bronchial epithelium. However, this is based on studies  
562 only revealing cells that double stain for epithelial and mesenchymal markers or on studies  
563 showing only a slight lower expression of E-cad in COPD. Also these studies concern cells from  
564 *ex-vivo* epithelium or fully differentiated epithelium *in vitro* ALI culture, and suggest that COPD  
565 cells may be rather imprinted for EMT, and in such, have a higher potential to enter EMT in  
566 permissive conditions (9, 17, 40).

567 In search of Slug function in basal/progenitor cells, we identified genes involved in  
568 proliferation that are repressed downstream of Slug in normal but not COPD cells. Among the  
569 genes studied, PCNA is apart: It is the gene with the least difference between normal and COPD  
570 of Slug KD effect, and this is coherent with the fact that there is no significant difference of  
571 expression between normal and COPD and no correlation with Slug for the effect of TGF- $\beta$ . In  
572 addition to its role in DNA replication, PCNA has also a role in DNA repair, making it a poor  
573 proliferation marker. In normal cells, Slug mRNA, but not protein, correlates with these  
574 proliferation-related genes. We cannot exclude that, by an unknown mechanism, Slug mRNA is  
575 involved in the repression of these genes; alternatively, Slug being regulated at the post-  
576 translational level (41) they could be repressed by a form of Slug protein not recognized by the

577 antibody used, and this form would be absent in COPD. In contrast to normal cells, a positive  
578 correlation is found between the effect of TGF- $\beta$  on these proliferation genes and on Slug. Our  
579 results confirm the involvement of Slug in proliferation previously reported and can provide an  
580 explanation to the fact that that some studies report Slug to be a repressor of proliferation (42-44),  
581 while others report a positive link with proliferation (2, 45, 46). Normal and COPD basal cells  
582 may represent two cell states with a different regulation of proliferation genes by Slug and TGF- $\beta$   
583 and this could be similar to what is observed in the different studies that use cell lines from  
584 different origin.

585 Our work reveals that genes downstream of Slug are different between normal and COPD  
586 cells and that they respond differently to TGF- $\beta$ . In normal cells, Slug is involved in the response  
587 of proliferation genes to TGF- $\beta$  while in COPD TGF- $\beta$  regulates Slug and the proliferation genes  
588 through different mechanisms, with proliferation gene expression being linked to  $\beta$ -cat activation  
589 by TGF- $\beta$ . In fact, Slug,  $\beta$ -cat and Smad3 protein have all been reported to be stabilized  
590 following GSK-3 $\beta$  inactivation (41, 47, 48) and we can speculate that in COPD cells, the  
591 increased levels of these proteins results from such a mechanism induced by TGF- $\beta$ .

592 TGF- $\beta$  function is complex and has a wide spectrum of effects depending on cell state: it  
593 is a cell cycle inhibitor in normal cells and a tumor promoter in malignant cells (49, 50). The  
594 difference between normal and COPD cells could reflect these antagonistic effects of TGF- $\beta$ ,  
595 COPD being in a premalignant state. Moreover, the higher expression of Slug protein seen in  
596 COPD basal cells in presence of TGF- $\beta$  could increase during repeated injury. Slug levels of  
597 expression define its function (3) and overexpression of Slug induces EMT in epithelial cells  
598 (33). We can also speculate that such deregulations of the progenitor cells could ultimately lead to

599 a shift in Slug function, becoming an EMT-inducing factor. That could explain the higher EMT  
600 features found in COPD epithelium and the increase risks for COPD to develop lung carcinomas.

601

## 602 **Acknowledgements**

603 We thank the Pulmonary Department, the Pathology Department and the Thoracic Surgery  
604 Department at Bichat-Claude Bernard University Hospital (Paris, France) and INSERM UMR  
605 1152 for providing lung tissues and isolating the cells. We thank Audrey Rapinat and David  
606 Gentien at the Genomics platform, Curie Institute (Paris, France) for Affymetrix GeneChip  
607 hybridization. We thank Dusko Ilic and Pierre Savagner for critical reading of the manuscript and  
608 helpful discussions. P.L. is supported by the French National Center for Scientific Research  
609 (CNRS). This work was supported by a donation from Association Science et Technologie  
610 (Groupe Servier) to P.L. and by funding from French National Institute for Medical Research  
611 (INSERM).

612

## 613 **References**

- 614 1. Nieto MA, Huang RY, Jackson RA, Thiery JP. Emt: 2016. *Cell* 2016;166(1):21-  
615 45.
- 616 2. Nassour M, Idoux-Gillet Y, Selmi A, Come C, Faraldo ML, Deugnier MA, et al.  
617 Slug controls stem/progenitor cell growth dynamics during mammary gland  
618 morphogenesis. *PLoS One* 2012;7(12):e53498.

- 619 3. Mistry DS, Chen Y, Wang Y, Zhang K, Sen GL. SNAI2 controls the  
620 undifferentiated state of human epidermal progenitor cells. *Stem Cells*  
621 2014;32(12):3209-18.
- 622 4. Tesei A, Zoli W, Arienti C, Storci G, Granato AM, Pasquinelli G, et al. Isolation  
623 of stem/progenitor cells from normal lung tissue of adult humans. *Cell Prolif*  
624 2009;42(3):298-308.
- 625 5. Hackett NR, Shaykhiev R, Walters MS, Wang R, Zwick RK, Ferris B, et al. The  
626 human airway epithelial basal cell transcriptome. *PLoS One*  
627 2011;6(5):e18378.
- 628 6. Rock JR, Onaitis MW, Rawlins EL, Lu Y, Clark CP, Xue Y, et al. Basal cells as  
629 stem cells of the mouse trachea and human airway epithelium. *Proc Natl*  
630 *Acad Sci U S A* 2009;106(31):12771-5.
- 631 7. Rock JR, Randell SH, Hogan BL. Airway basal stem cells: a perspective on  
632 their roles in epithelial homeostasis and remodeling. *Dis Model Mech*  
633 2010;3(9-10):545-56.
- 634 8. Fulcher ML, Gabriel S, Burns KA, Yankaskas JR, Randell SH. Well-  
635 differentiated human airway epithelial cell cultures. *Methods Mol Med*  
636 2005;107:183-206.
- 637 9. Gohy ST, Hupin C, Fregimilicka C, Detry BR, Bouzin C, Gaide Chevronay H, et  
638 al. Imprinting of the COPD airway epithelium for dedifferentiation and  
639 mesenchymal transition. *Eur Respir J* 2015;45(5):1258-72.
- 640 10. Rigden HM, Alias A, Havelock T, O'Donnell R, Djukanovic R, Davies DE, et al.  
641 Squamous Metaplasia Is Increased in the Bronchial Epithelium of Smokers

- 642 with Chronic Obstructive Pulmonary Disease. PLoS One  
643 2016;11(5):e0156009.
- 644 11. Sohal SS, Walters EH. Role of epithelial mesenchymal transition (EMT) in  
645 chronic obstructive pulmonary disease (COPD). *Respir Res* 2013;14:120.
- 646 12. Steiling K, van den Berge M, Hijazi K, Florido R, Campbell J, Liu G, et al. A  
647 dynamic bronchial airway gene expression signature of chronic obstructive  
648 pulmonary disease and lung function impairment. *Am J Respir Crit Care Med*  
649 2013;187(9):933-42.
- 650 13. Randell SH. Airway epithelial stem cells and the pathophysiology of chronic  
651 obstructive pulmonary disease. *Proc Am Thorac Soc* 2006;3(8):718-25.
- 652 14. Powell HA, Iyen-Omofoman B, Baldwin DR, Hubbard RB, Tata LJ. Chronic  
653 obstructive pulmonary disease and risk of lung cancer: the importance of  
654 smoking and timing of diagnosis. *J Thorac Oncol* 2013;8(1):6-11.
- 655 15. Young RP, Hopkins RJ, Christmas T, Black PN, Metcalf P, Gamble GD. COPD  
656 prevalence is increased in lung cancer, independent of age, sex and smoking  
657 history. *Eur Respir J* 2009;34(2):380-6.
- 658 16. Mahmood MQ, Sohal SS, Shukla SD, Ward C, Hardikar A, Noor WD, et al.  
659 Epithelial mesenchymal transition in smokers: large versus small airways  
660 and relation to airflow obstruction. *Int J Chron Obstruct Pulmon Dis*  
661 2015;10:1515-24.
- 662 17. Mahmood MQ, Reid D, Ward C, Muller HK, Knight DA, Sohal SS, et al.  
663 Transforming growth factor (TGF) beta1 and Smad signalling pathways: A

- 664 likely key to EMT-associated COPD pathogenesis. *Respirology*  
665 2017;22(1):133-140.
- 666 18. Slabakova E, Pernicova Z, Slavickova E, Starsichova A, Kozubik A, Soucek K.  
667 TGF-beta1-induced EMT of non-transformed prostate hyperplasia cells is  
668 characterized by early induction of SNAI2/Slug. *Prostate* 2011;71(12):1332-  
669 43.
- 670 19. Xu J, Lamouille S, Derynck R. TGF-beta-induced epithelial to mesenchymal  
671 transition. *Cell Res* 2009;19(2):156-72.
- 672 20. Yumoto K, Thomas PS, Lane J, Matsuzaki K, Inagaki M, Ninomiya-Tsuji J, et al.  
673 TGF-beta-activated kinase 1 (Tak1) mediates agonist-induced Smad  
674 activation and linker region phosphorylation in embryonic craniofacial  
675 neural crest-derived cells. *J Biol Chem* 2013;288(19):13467-80.
- 676 21. Bryant DM, Datta A, Rodriguez-Fraticelli AE, Peranen J, Martin-Belmonte F,  
677 Mostov KE. A molecular network for de novo generation of the apical surface  
678 and lumen. *Nat Cell Biol* 2010;12(11):1035-45.
- 679 22. Leroy P, Mostov KE. Slug is required for cell survival during partial epithelial-  
680 mesenchymal transition of HGF-induced tubulogenesis. *Mol Biol Cell*  
681 2007;18(5):1943-52.
- 682 23. Troncale S, Barbet A, Coulibaly L, Henry E, He B, Barillot E, et al. NormaCurve:  
683 a SuperCurve-based method that simultaneously quantifies and normalizes  
684 reverse phase protein array data. *PLoS One* 2012;7(6):e38686.

- 685 24. Maubant S, Tahtouh T, Brisson A, Maire V, Nemati F, Tesson B, et al. LRP5  
686 regulates the expression of STK40, a new potential target in triple-negative  
687 breast cancers. *Oncotarget* 2018;9(32):22586-22604.
- 688 25. de la Grange P, Dutertre M, Correa M, Auboeuf D. A new advance in  
689 alternative splicing databases: from catalogue to detailed analysis of  
690 regulation of expression and function of human alternative splicing variants.  
691 *BMC Bioinformatics* 2007;8:180.
- 692 26. de la Grange P, Dutertre M, Martin N, Auboeuf D. FAST DB: a website  
693 resource for the study of the expression regulation of human gene products.  
694 *Nucleic Acids Res* 2005;33(13):4276-84.
- 695 27. de la Grange P, Gratadou L, Delord M, Dutertre M, Auboeuf D. Splicing factor  
696 and exon profiling across human tissues. *Nucleic Acids Res* 2010;38(9):2825-  
697 38.
- 698 28. Kanehisa M, Goto S, Sato Y, Furumichi M, Tanabe M. KEGG for integration and  
699 interpretation of large-scale molecular data sets. *Nucleic Acids Res*  
700 2012;40(Database issue):D109-14.
- 701 29. Haw R, Stein L. Using the reactome database. *Curr Protoc Bioinformatics*  
702 2012;Chapter 8:Unit8 7.
- 703 30. Huang da W, Sherman BT, Lempicki RA. Systematic and integrative analysis  
704 of large gene lists using DAVID bioinformatics resources. *Nat Protoc*  
705 2009;4(1):44-57.
- 706 31. Akbani R, Becker KF, Carragher N, Goldstein T, de Koning L, Korf U, et al.  
707 Realizing the promise of reverse phase protein arrays for clinical,



- 708 translational, and basic research: a workshop report: the RPPA (Reverse  
709 Phase Protein Array) society. *Mol Cell Proteomics* 2014;13(7):1625-43.
- 710 32. Coussens MJ, Corman C, Fischer AL, Sago J, Swarthout J. MISSION LentiPlex  
711 pooled shRNA library screening in mammalian cells. *J Vis Exp* 2011(58).
- 712 33. Bolos V, Peinado H, Perez-Moreno MA, Fraga MF, Esteller M, Cano A. The  
713 transcription factor Slug represses E-cadherin expression and induces  
714 epithelial to mesenchymal transitions: a comparison with Snail and E47  
715 repressors. *J Cell Sci* 2003;116(Pt 3):499-511.
- 716 34. Savagner P. Leaving the neighborhood: molecular mechanisms involved  
717 during epithelial-mesenchymal transition. *Bioessays* 2001;23(10):912-23.
- 718 35. Jurikova M, Danihel L, Polak S, Varga I. Ki67, PCNA, and MCM proteins:  
719 Markers of proliferation in the diagnosis of breast cancer. *Acta Histochem*  
720 2016;118(5):544-52.
- 721 36. Logan CY, Nusse R. The Wnt signaling pathway in development and disease.  
722 *Annu Rev Cell Dev Biol* 2004;20:781-810.
- 723 37. Jolly MK, Tripathi SC, Jia D, Mooney SM, Celiktas M, Hanash SM, et al. Stability  
724 of the hybrid epithelial/mesenchymal phenotype. *Oncotarget*  
725 2016;7(19):27067-84.
- 726 38. Lu M, Jolly MK, Levine H, Onuchic JN, Ben-Jacob E. MicroRNA-based  
727 regulation of epithelial-hybrid-mesenchymal fate determination. *Proc Natl*  
728 *Acad Sci U S A* 2013;110(45):18144-9.
- 729 39. Ye GD, Sun GB, Jiao P, Chen C, Liu QF, Huang XL, et al. OVOL2, an Inhibitor of  
730 WNT Signaling, Reduces Invasive Activities of Human and Mouse Cancer

- 731 Cells and Is Down-regulated in Human Colorectal Tumors. *Gastroenterology*  
732 2016;150(3):659-671 e16.
- 733 40. Sohal SS, Reid D, Soltani A, Ward C, Weston S, Muller HK, et al. Evaluation of  
734 epithelial mesenchymal transition in patients with chronic obstructive  
735 pulmonary disease. *Respir Res* 2011;12:130.
- 736 41. Kim JY, Kim YM, Yang CH, Cho SK, Lee JW, Cho M. Functional Regulation of  
737 Slug/Snai2 is dependant on GSK-3b-mediated phosphorylation. *FEBS J*  
738 2012;279(16):2929-39.
- 739 42. Sun Y, Shao L, Bai H, Wang ZZ, Wu WS. Slug deficiency enhances self-renewal  
740 of hematopoietic stem cells during hematopoietic regeneration. *Blood*  
741 2010;115(9):1709-17.
- 742 43. Turner FE, Broad S, Khanim FL, Jeanes A, Talma S, Hughes S, et al. Slug  
743 regulates integrin expression and cell proliferation in human epidermal  
744 keratinocytes. *J Biol Chem* 2006;281(30):21321-31.
- 745 44. Wang WL, Huang HC, Kao SH, Hsu YC, Wang YT, Li KC, et al. Slug is temporally  
746 regulated by cyclin E in cell cycle and controls genome stability. *Oncogene*  
747 2015;34(9):1116-25.
- 748 45. Bhat-Nakshatri P, Appaiah H, Ballas C, Pick-Franke P, Goulet R, Jr., Badve S, et  
749 al. SLUG/SNAI2 and tumor necrosis factor generate breast cells with  
750 CD44+/CD24- phenotype. *BMC Cancer* 2010;10:411.
- 751 46. Phillips S, Prat A, Sedic M, Proia T, Wronski A, Mazumdar S, et al. Cell-state  
752 transitions regulated by SLUG are critical for tissue regeneration and tumor  
753 initiation. *Stem Cell Reports* 2014;2(5):633-47.

- 754 47. Guo X, Ramirez A, Waddell DS, Li Z, Liu X, Wang XF. Axin and GSK3- control  
755 Smad3 protein stability and modulate TGF - signaling. *Genes Dev*  
756 2008;22(1):106-20.
- 757 48. Liu C, Li Y, Semenov M, Han C, Baeq GH, Tan Y, et al. Control of beta-catenin  
758 phosphorylation/degradation by a dual mechanism. *Cell* 2002;108(6):837-  
759 47.
- 760 49. Derynck R, Akhurst RJ, Balmain A. TGF-beta signaling in tumor suppression  
761 and cancer progression. *Nat Genet* 2001;29(2):117-29.
- 762 50. Fynan TM, Reiss M. Resistance to inhibition of cell growth by transforming  
763 growth factor-beta and its role in oncogenesis. *Crit Rev Oncog*  
764 1993;4(5):493-540.

765

## 766 **Supporting information**

767 **S1 Fig. Bronchial epithelial progenitors from COPD express Slug in their nuclei.**

768 Primary bronchial epithelial basal cells from COPD were grown on filters and analyzed undifferentiated at  
769 confluence by fluorescent immunocytochemistry. Cells were fixed and labeled simultaneously with progenitor cell  
770 marker p63 (white) and Slug (green) antibodies and with Hoechst as a marker of nuclei (blue). Bars are 20  $\mu$ m.

771

772 **S2A-D Fig. Bronchial epithelial progenitors express Slug in their nuclei and co-express E-cadherin with or**

773 **without TGF- $\beta$ .** Normal (A-B) or COPD (C-D) primary bronchial epithelial basal cells were grown on filters and at  
774 confluence changed to ALI culture to induce differentiation, without TGF- $\beta$  (A, C) or in presence of 1 ng/ml of TGF-  
775  $\beta$  (B, D). Cells were analyzed at day 6 of ALI culture by fluorescent immunocytochemistry. Cells were fixed and  
776 labeled simultaneously with Slug (green) and E-cad (red) antibodies and with Hoechst as a marker of nuclei (blue).

777 Bars are 20  $\mu$ m.

778

779 **S1 Table. List of the 514 genes upregulated by Slug knockdown in normal bronchial basal/progenitor cells.**

780 Genes statistically significant upregulated by Slug knockdown in normal bronchial basal/progenitor cells:

781 Table shows the response of the genes to differentiation and TGF $\beta$  and fold-change for Slug knockdown in COPD

782 cells. Genes were selected for a log<sub>2</sub> (fold-Change)  $\geq 0.26$ . Statistical significance is at p-val < 5.00E-02

783

784 **S1 Appendix: Characteristics of the study subjects.**

785 Data are presented as Mean  $\pm$ SD. Pack-year=1 year smoking 20 cigarettes per day. COPD, chronic obstructive

786 pulmonary disease; FEV<sub>1</sub>, forced expiratory volume in 1 s;

787

788 **S2 Appendix: Sequences of primers for PCR and shRNA**

789

790 **S3 Appendix: References for antibodies used in immunocytochemistry and RPPA**

791 CST: Cell Signaling Technology; DBS: Diagnostic BioSystems; BD: Becton Dickinson Biosciences

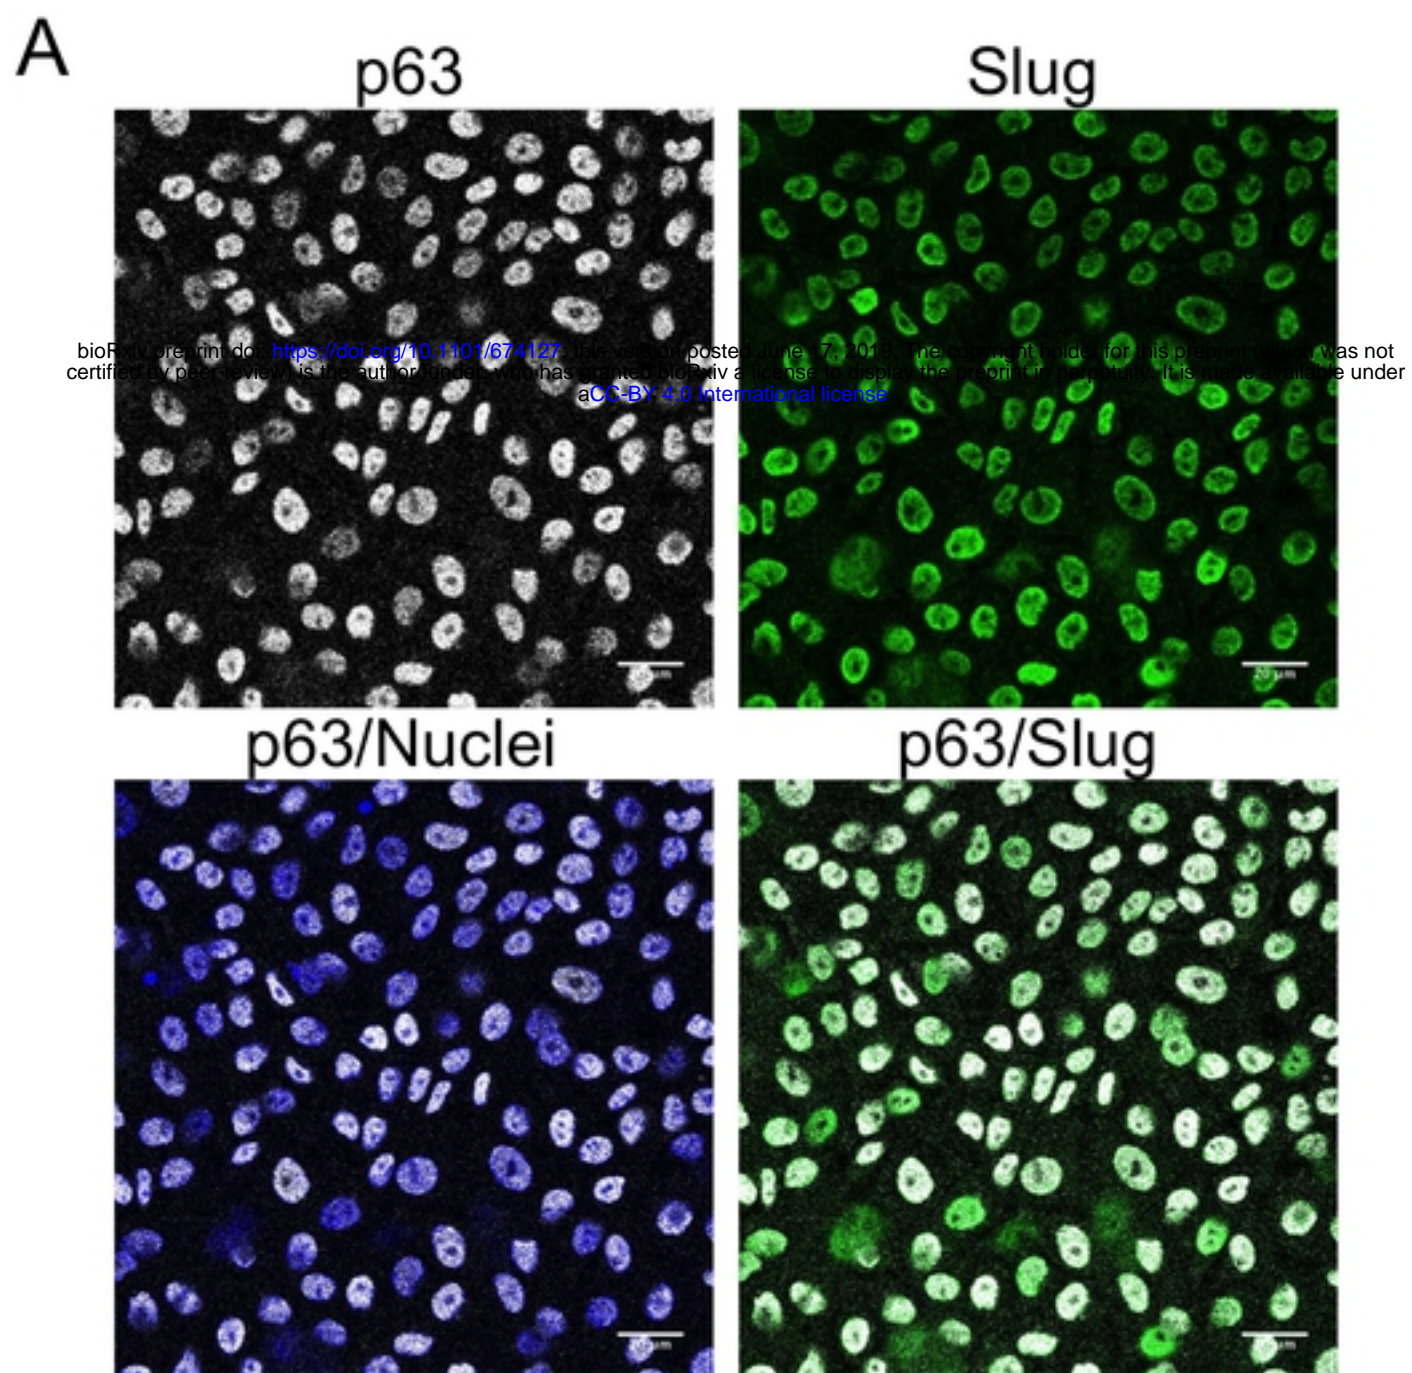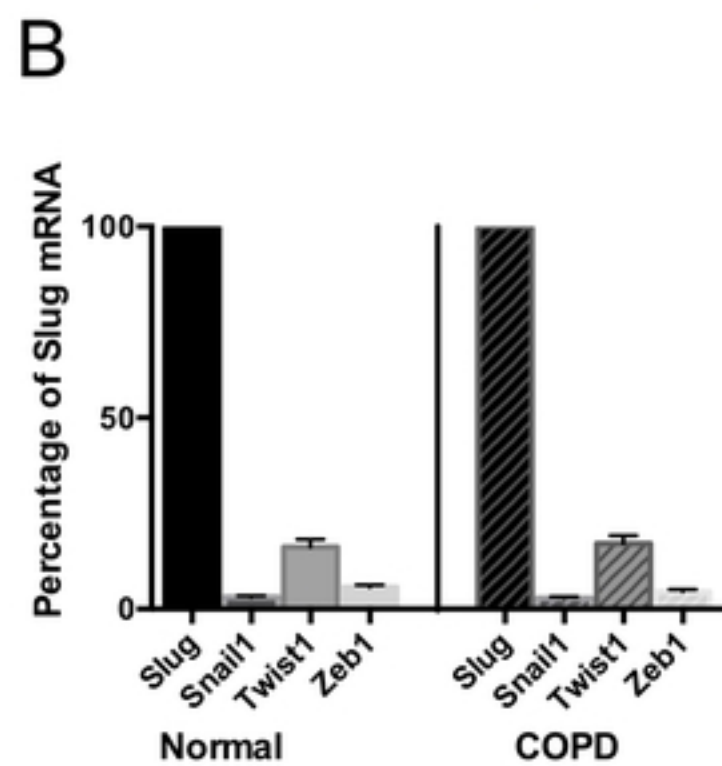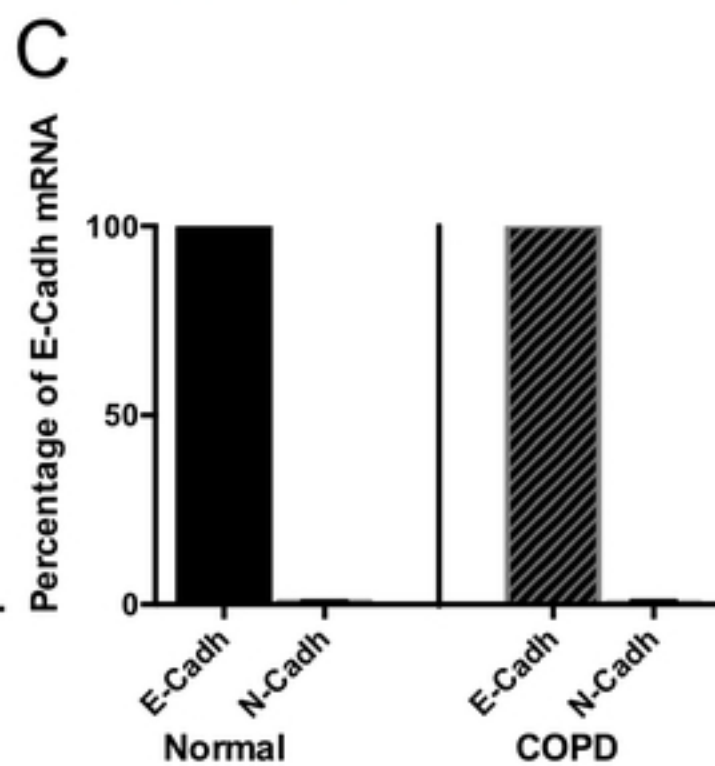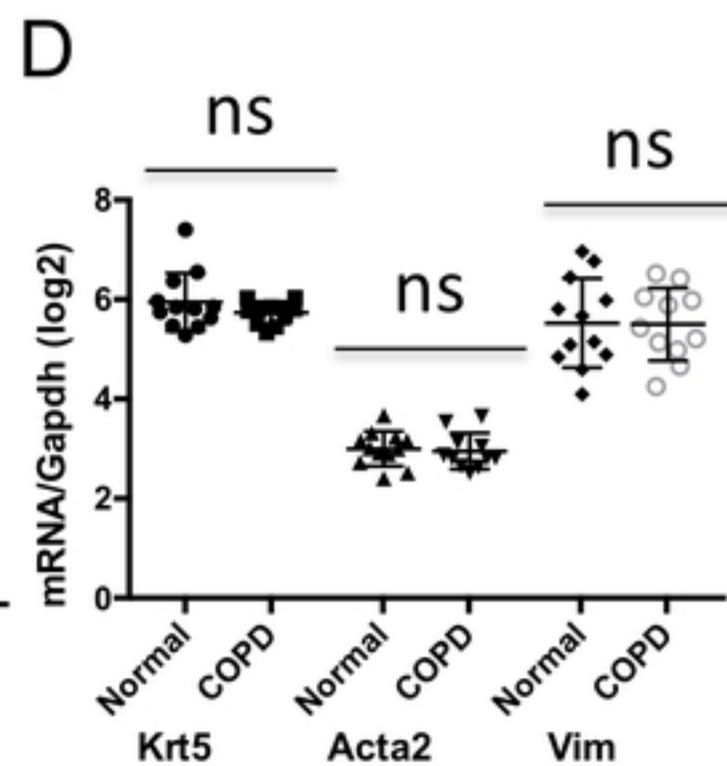

Figure 1



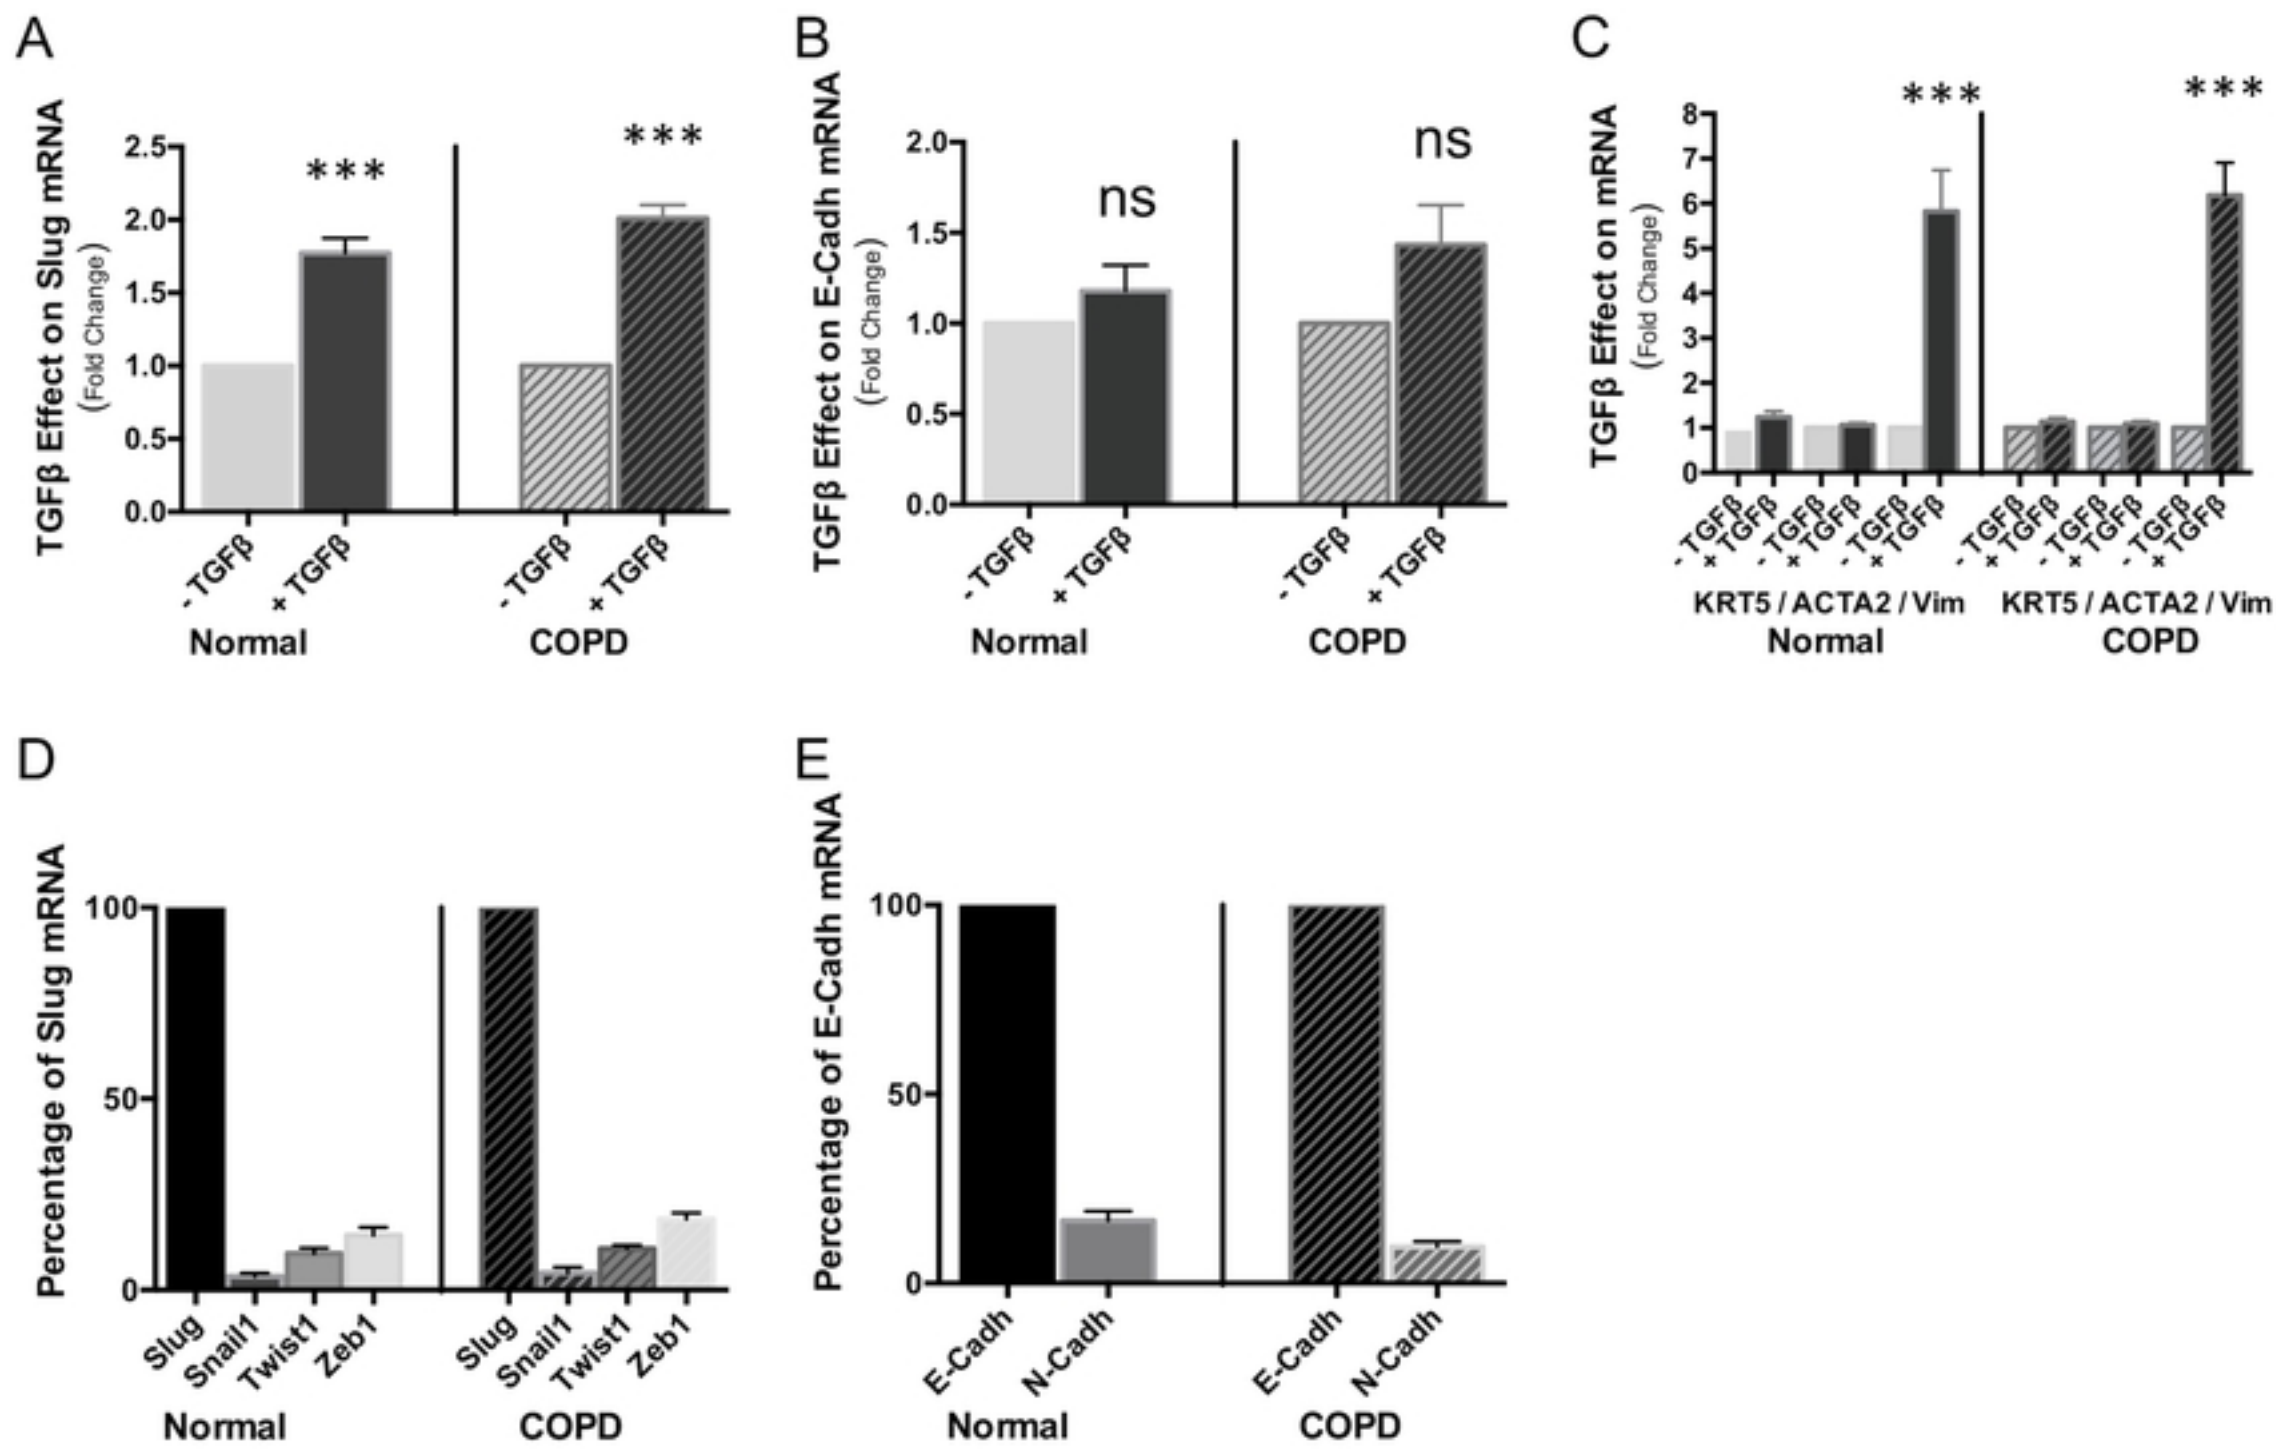

Figure 2

**A**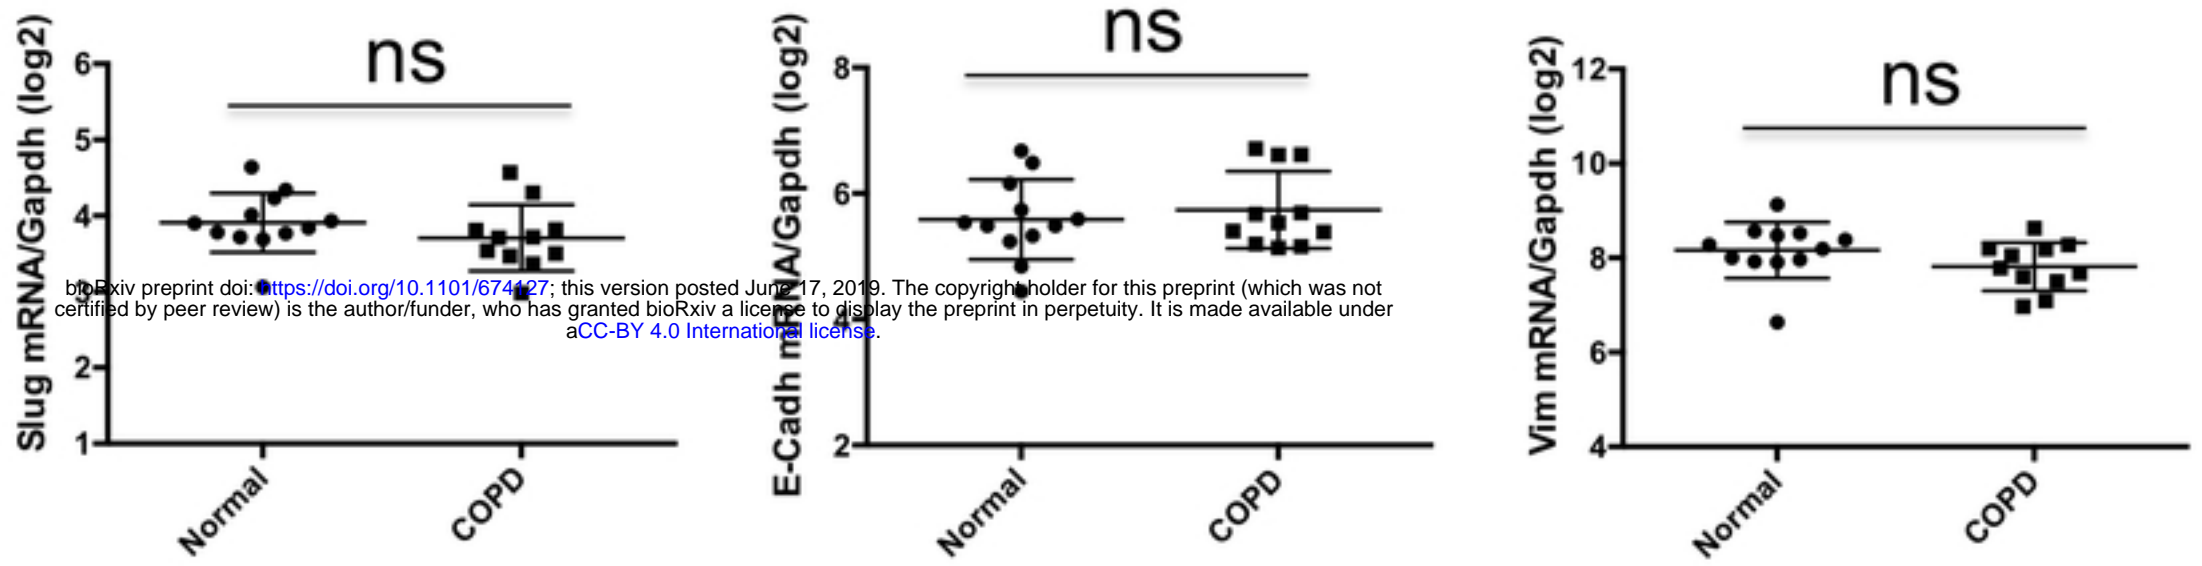**B**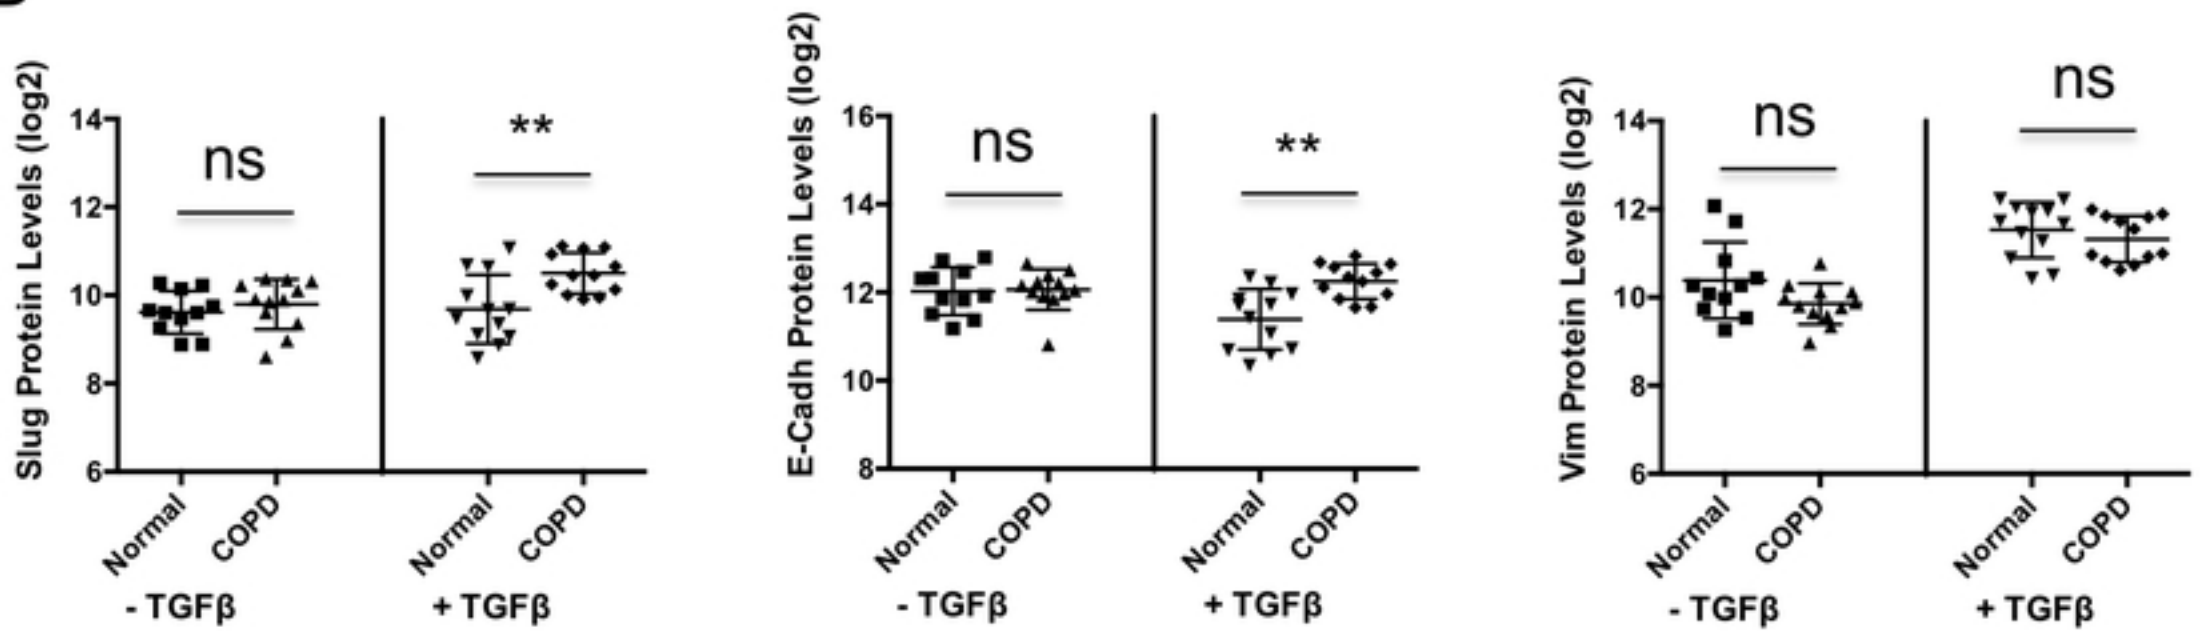**C**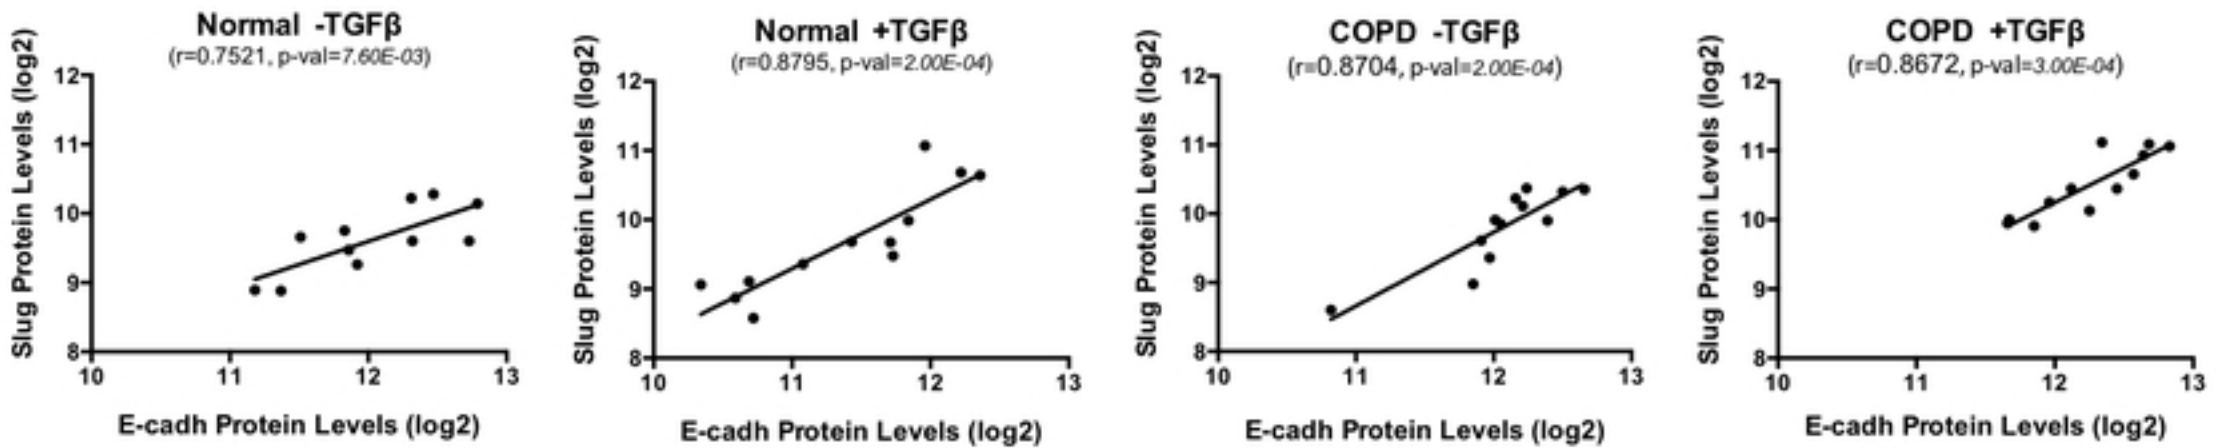

Figure 3

A

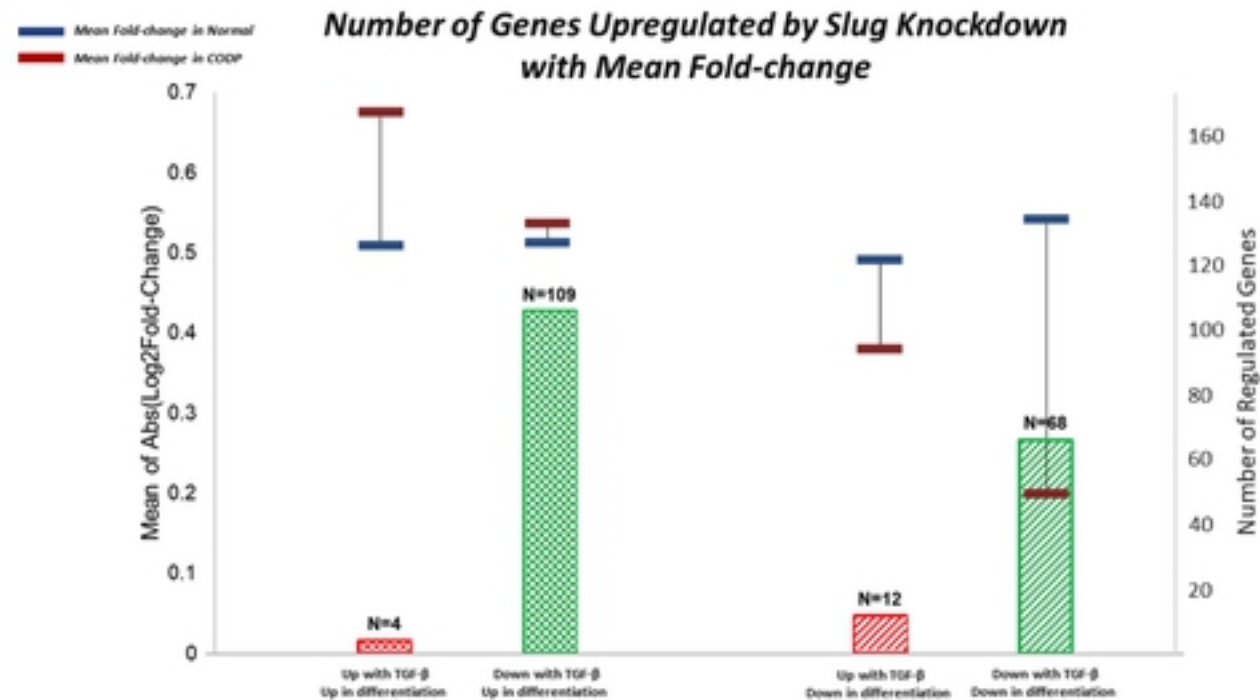

B

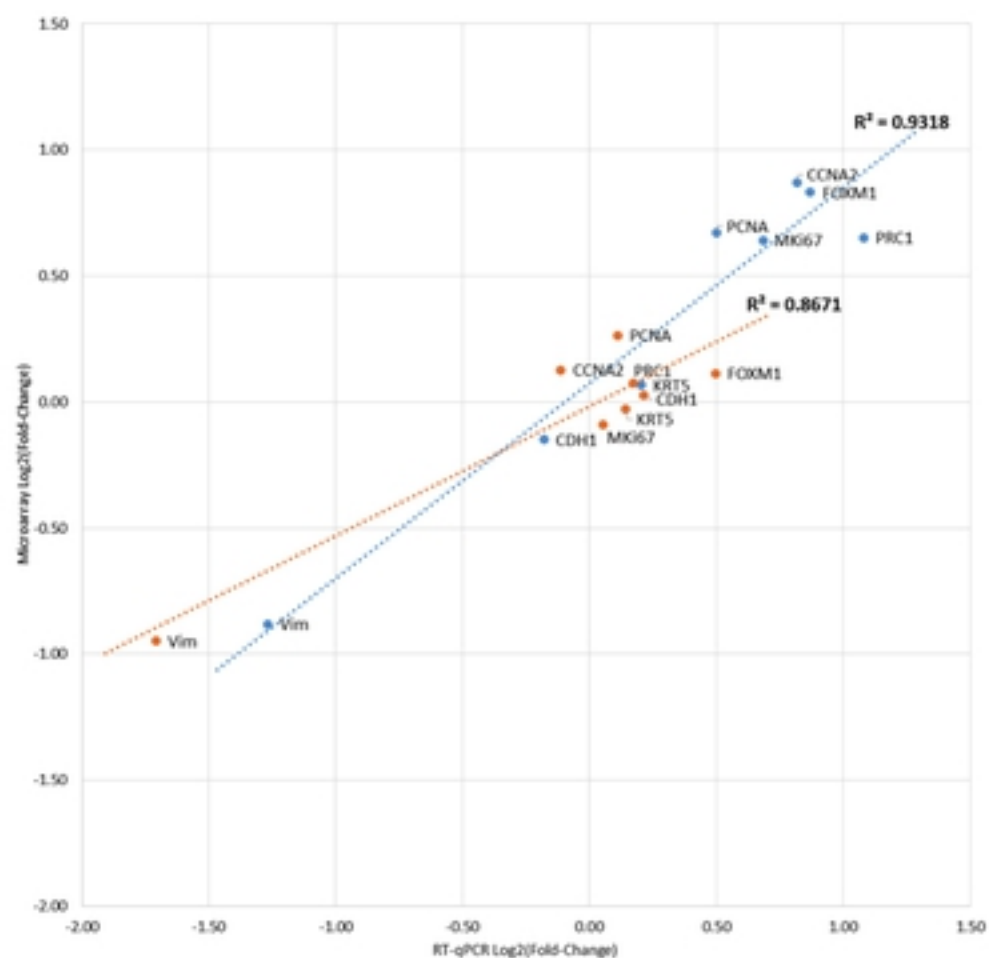

Figure 4



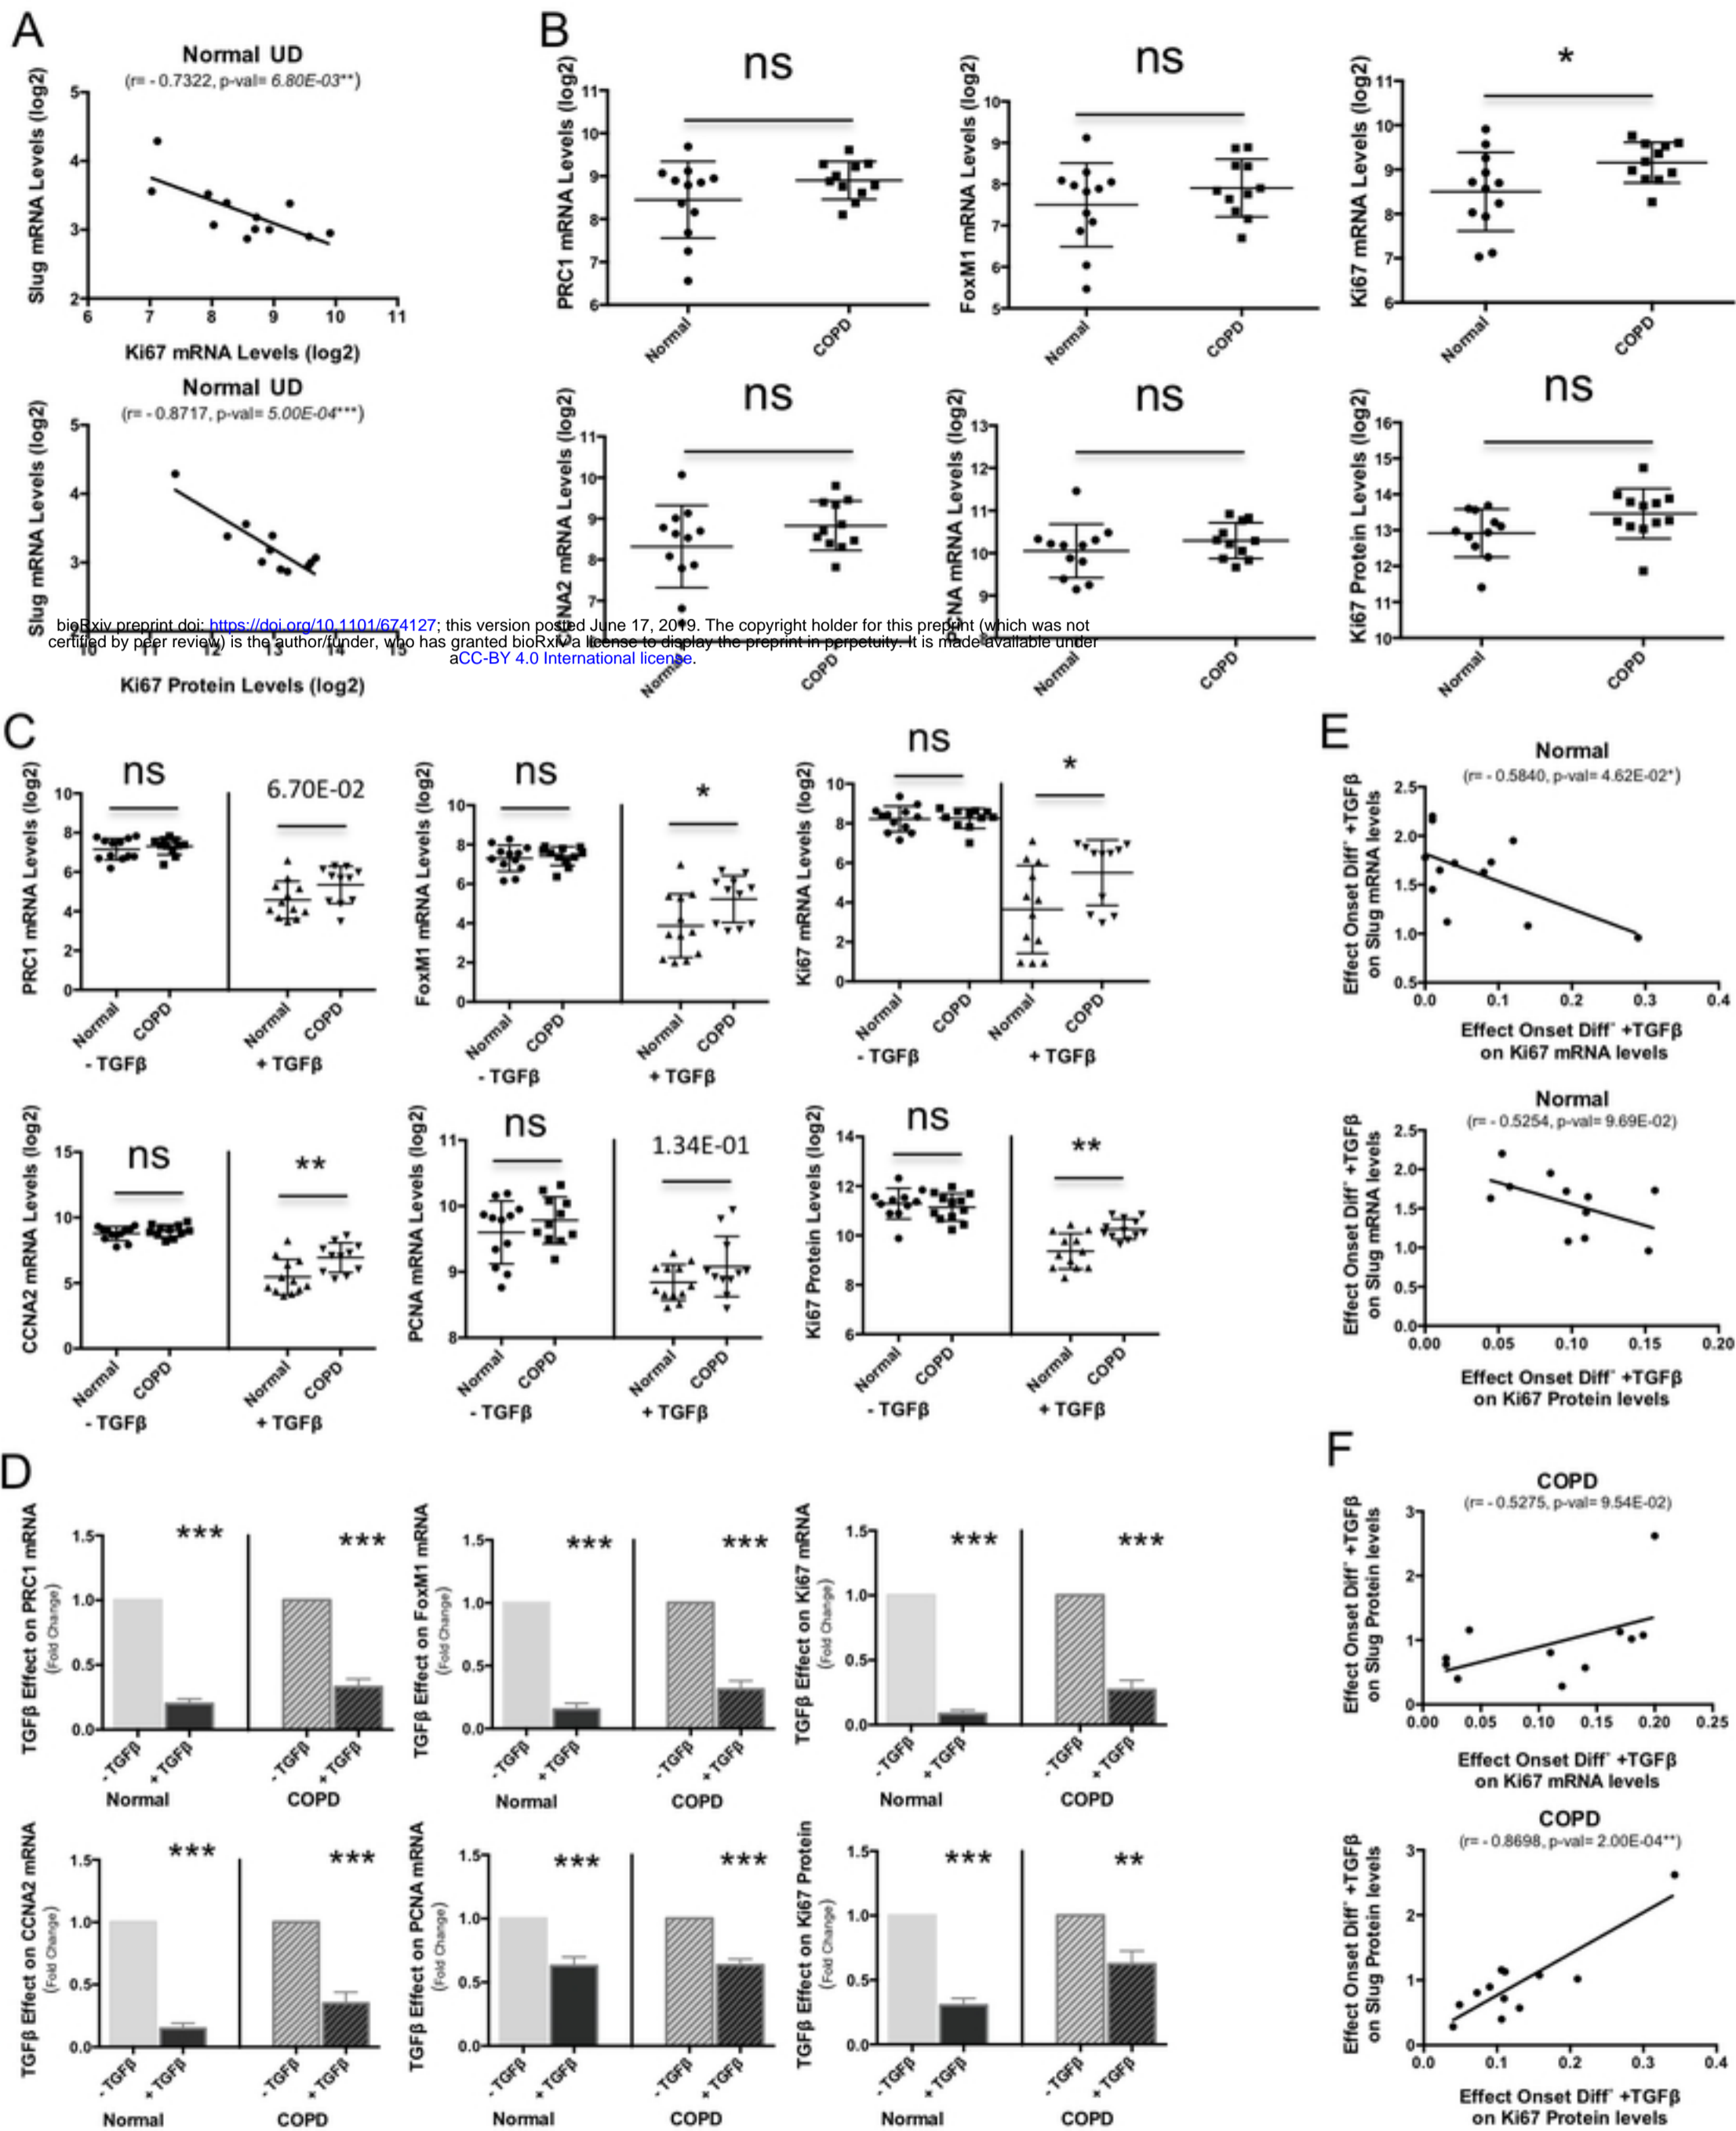

Figure 5

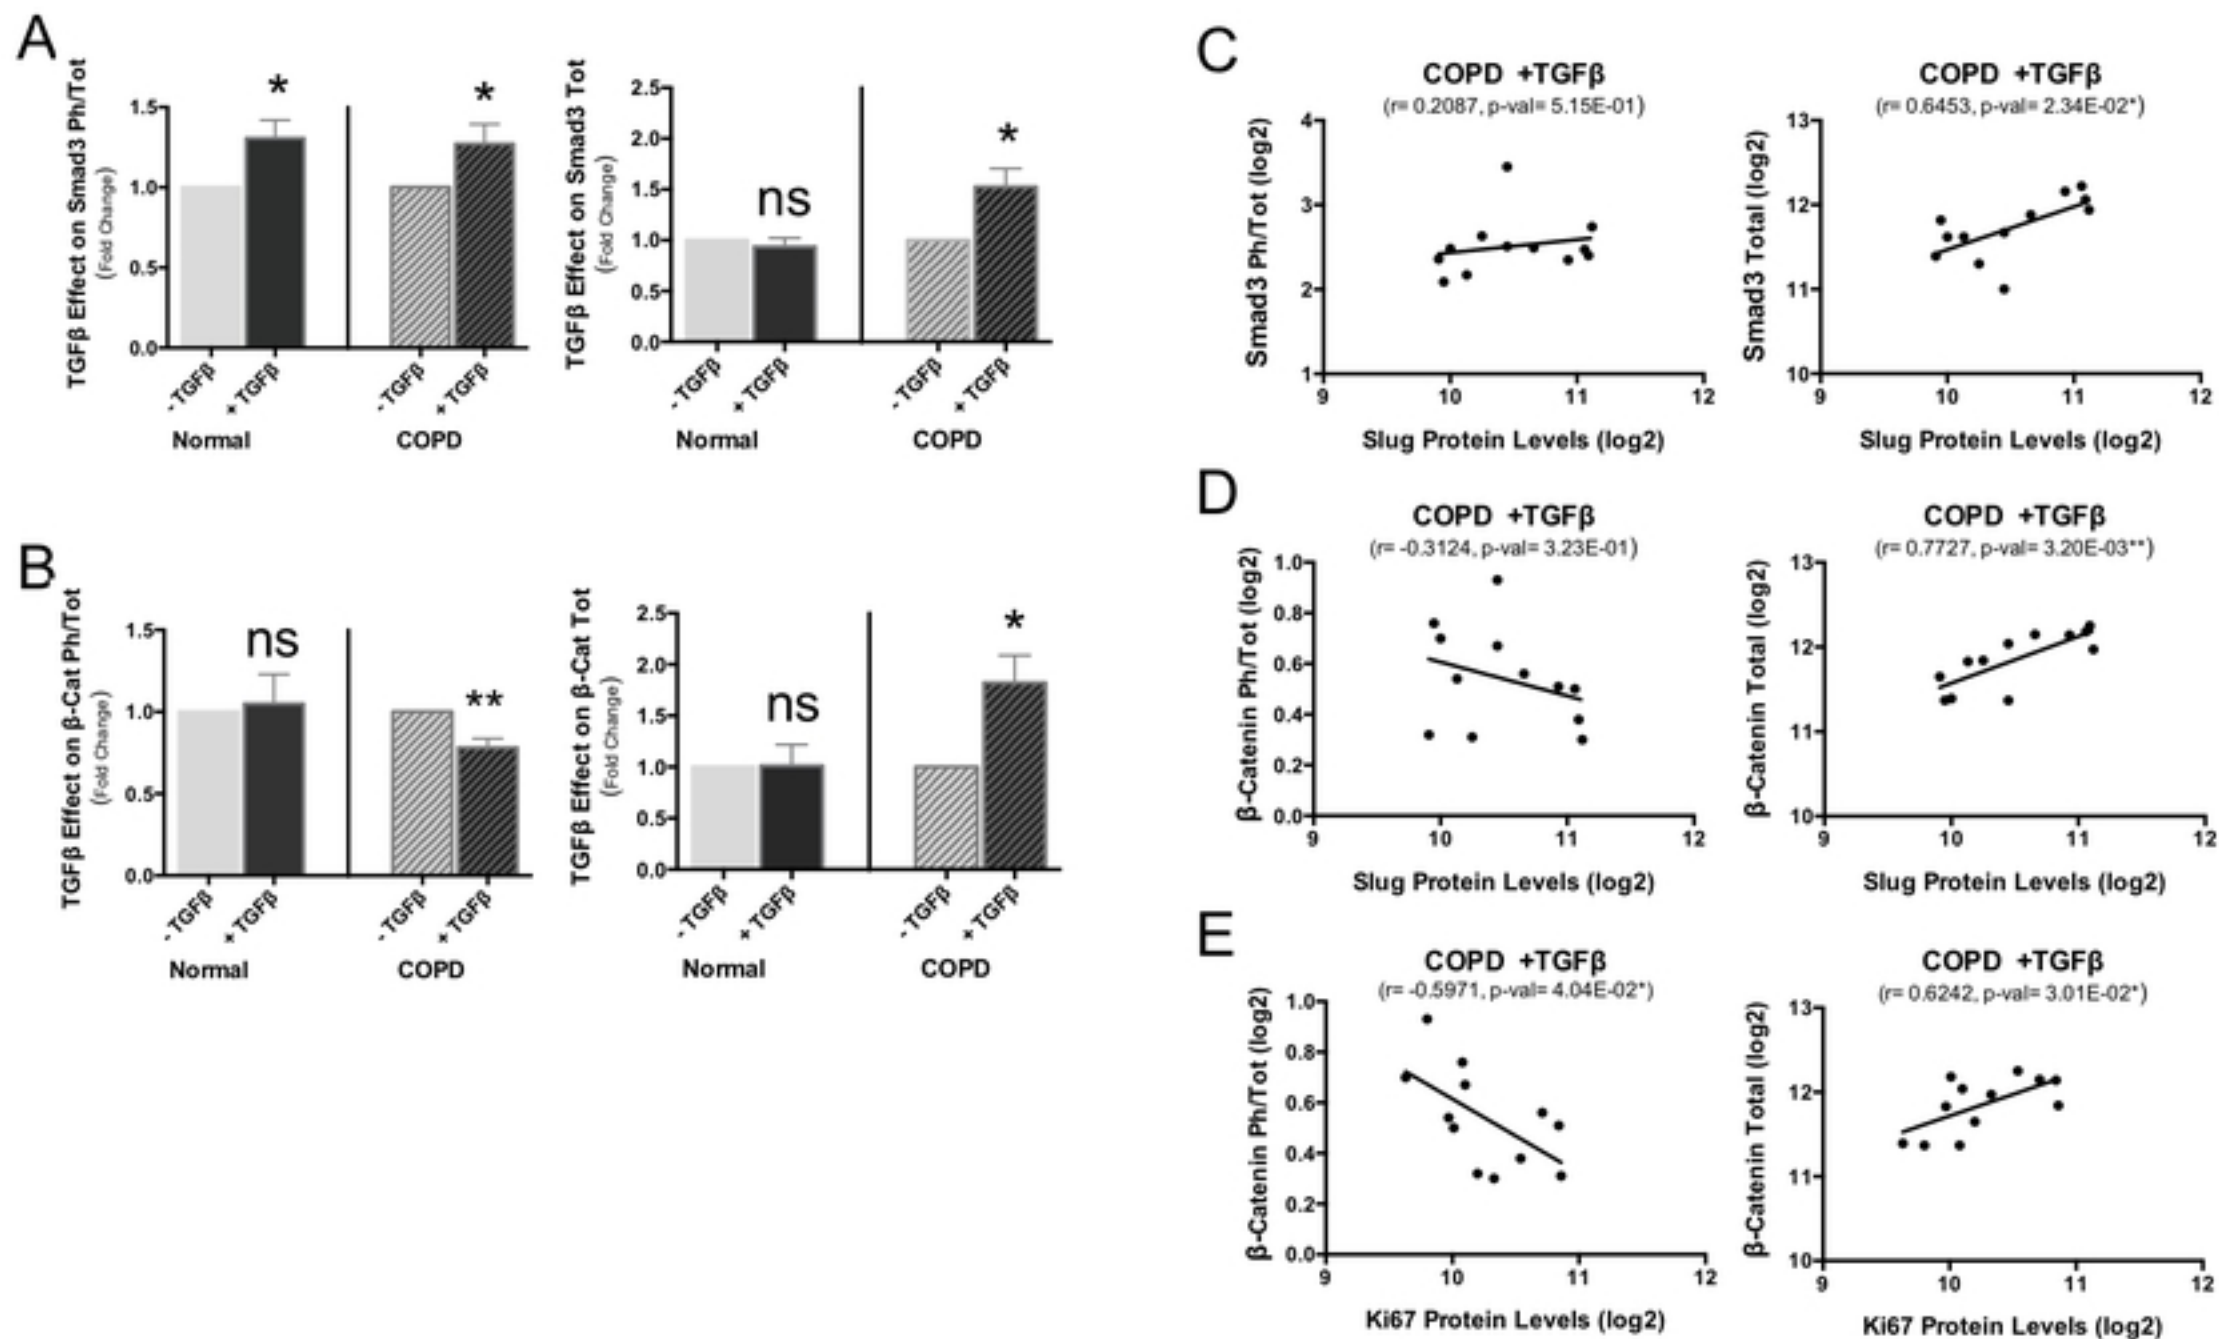

Figure 6
